# Supplementary material for: Pan-cancer analysis identifies DDX56 as a prognostic biomarker associated with immune infiltration and drug sensitivity
Source: Front Genet. 2022 Dec 7;13:1004467. doi: 10.3389/fgene.2022.1004467 (PMC9768347; doi:10.3389/fgene.2022.1004467)
Supplement: Supplementary file 1 [file Table2.XLSX]

## Sheet: Sheet 1
Gene	Author (Year)	Cell Type	Cell Line	tumor	Condition (Dosage)	Phenotype	Library	Enzyme	Analysis	HIT
DDX56	Hart T (2015)	Colorectal Cancer Cell Line	HCT-116	COAD	-	cell proliferation	CRISPRn	Cas9	BAGEL	YES
DDX56	Hart T (2015)	Cervical Adenocarcinoma Cell Line	HeLa	CESC	-	cell proliferation	CRISPRn	Cas9	BAGEL	YES
DDX56	Hart T (2015)	Glioblastoma Cell Line	143B	GBMLGG	-	cell proliferation	CRISPRn	Cas9	BAGEL	YES
DDX56	Hart T (2015)	Colonic Adenocarcinoma Cell Line	DLD-1	COAD	-	cell proliferation	CRISPRn	Cas9	BAGEL	YES
DDX56	Shalem O (2014)	Melanoma Cell Line	A-375	SKCM	-	cell proliferation	CRISPRn	Cas9	Log2 Fold Change (L2FC)	YES
DDX56	Steinhart Z (2017)	Pancreatic Adenocarcinoma Cell Line	HPAF-2	PAAD	-	cell proliferation	CRISPRn	Cas9	BAGEL	YES
DDX56	Steinhart Z (2017)	Pancreatic Adenocarcinoma Cell Line	PA-TU-8988S	PAAD	-	cell proliferation	CRISPRn	Cas9	BAGEL	YES
DDX56	Steinhart Z (2017)	Pancreatic Adenocarcinoma Cell Line	AsPC1	PAAD	-	cell proliferation	CRISPRn	Cas9	BAGEL	YES
DDX56	Tzelepis K (2016)	Colonic Adenocarcinoma Cell Line	HT-29	COAD	-	cell proliferation	CRISPRn	Cas9	MaGeCK	YES
DDX56	Meyers RM (2017)	Urinary Bladder Cancer Cell Line	5637	BLCA	-	cell proliferation	CRISPRn	Cas9	CERES	YES
DDX56	Meyers RM (2017)	Anaplastic Thyroid Cancer Cell Line	8305C	THCA	-	cell proliferation	CRISPRn	Cas9	CERES	YES
DDX56	Meyers RM (2017)	Melanoma Cell Line	A2058	SKCM	-	cell proliferation	CRISPRn	Cas9	CERES	YES
DDX56	Meyers RM (2017)	Ovarian Cancer Cell Line	A2780	OV	-	cell proliferation	CRISPRn	Cas9	CERES	YES
DDX56	Meyers RM (2017)	Lung Cancer Cell Line	A549	LUAD	-	cell proliferation	CRISPRn	Cas9	CERES	YES
DDX56	Meyers RM (2017)	Gastric Adenocarcinoma Cell Line	AGS	STAD	-	cell proliferation	CRISPRn	Cas9	CERES	YES
DDX56	Meyers RM (2017)	Breast Cancer Cell Line	AU-565	BRCA	-	cell proliferation	CRISPRn	Cas9	CERES	YES
DDX56	Meyers RM (2017)	Ovarian Cancer Cell Line	CAOV-3	OV	-	cell proliferation	CRISPRn	Cas9	CERES	YES
DDX56	Meyers RM (2017)	Glioblastoma Cell Line	YKG1 (RCB2110)	GBMLGG	-	cell proliferation	CRISPRn	Cas9	CERES	YES
DDX56	Meyers RM (2017)	Melanoma Cell Line	WM-793	SKCM	-	cell proliferation	CRISPRn	Cas9	CERES	YES
DDX56	Meyers RM (2017)	Melanoma Cell Line	WM-266-4	SKCM	-	cell proliferation	CRISPRn	Cas9	CERES	YES
DDX56	Meyers RM (2017)	Melanoma Cell Line	WM-115	SKCM	-	cell proliferation	CRISPRn	Cas9	CERES	YES
DDX56	Meyers RM (2017)	Melanoma Cell Line	UACC-62	SKCM	-	cell proliferation	CRISPRn	Cas9	CERES	YES
DDX56	Meyers RM (2017)	Melanoma Cell Line	UACC-257	SKCM	-	cell proliferation	CRISPRn	Cas9	CERES	YES
DDX56	Meyers RM (2017)	Glioblastoma Cell Line	U-87MG	GBMLGG	-	cell proliferation	CRISPRn	Cas9	CERES	YES
DDX56	Meyers RM (2017)	Glioma Cell Line	U-343 MG-A	GBMLGG	-	cell proliferation	CRISPRn	Cas9	CERES	YES
DDX56	Meyers RM (2017)	Glioma Cell Line	U-251 MG	GBMLGG	-	cell proliferation	CRISPRn	Cas9	CERES	YES
DDX56	Meyers RM (2017)	Renal Cell Carcinoma Cell Line	TUHR-4TKB	KIRC	-	cell proliferation	CRISPRn	Cas9	CERES	YES
DDX56	Meyers RM (2017)	Renal Cell Carcinoma Cell Line	TUHR-10TKB	KIRC	-	cell proliferation	CRISPRn	Cas9	CERES	YES
DDX56	Meyers RM (2017)	Glioblastoma Cell Line	8-MG-BA	GBMLGG	-	cell proliferation	CRISPRn	Cas9	CERES	YES
DDX56	Meyers RM (2017)	Glioblastoma Cell Line	42-MG-BA	GBMLGG	-	cell proliferation	CRISPRn	Cas9	CERES	YES
DDX56	Meyers RM (2017)	Ovarian Cancer Cell Line	59M	OV	-	cell proliferation	CRISPRn	Cas9	CERES	YES
DDX56	Meyers RM (2017)	Renal Cell Carcinoma Cell Line	RCC 786-O	KIRC	-	cell proliferation	CRISPRn	Cas9	CERES	YES
DDX56	Meyers RM (2017)	Lung Cancer Cell Line	ABC-1	LUAD	-	cell proliferation	CRISPRn	Cas9	CERES	YES
DDX56	Meyers RM (2017)	Pancreatic Adenocarcinoma Cell Line	AsPC1	PAAD	-	cell proliferation	CRISPRn	Cas9	CERES	YES
DDX56	Meyers RM (2017)	Urinary Bladder Cancer Cell Line	BC-3C	BLCA	-	cell proliferation	CRISPRn	Cas9	CERES	YES
DDX56	Meyers RM (2017)	Mammary Gland Tumor Cell Line	BT-549	BRCA	-	cell proliferation	CRISPRn	Cas9	CERES	YES
DDX56	Meyers RM (2017)	Pancreatic Ductal Adenocarcinoma Cell Line	CFPAC-1	PAAD	-	cell proliferation	CRISPRn	Cas9	CERES	YES
DDX56	Meyers RM (2017)	Breast Cancer Cell Line	ZR751	BRCA	-	cell proliferation	CRISPRn	Cas9	CERES	YES
DDX56	Meyers RM (2017)	Melanoma Cell Line	WM-983/B	SKCM	-	cell proliferation	CRISPRn	Cas9	CERES	YES
DDX56	Meyers RM (2017)	Bladder Carcinoma	VM-CUB1	BLCA	-	cell proliferation	CRISPRn	Cas9	CERES	YES
DDX56	Meyers RM (2017)	Bladder Transitional Cell Carcinoma Cell Line	UM-UC-3	BLCA	-	cell proliferation	CRISPRn	Cas9	CERES	YES
DDX56	Meyers RM (2017)	Ovary Adenocarcinoma Cell Line	EFO-27	OV	-	cell proliferation	CRISPRn	Cas9	CERES	YES
DDX56	Meyers RM (2017)	Ovarian Cancer Cell Line	ES-2	OV	-	cell proliferation	CRISPRn	Cas9	CERES	YES
DDX56	Meyers RM (2017)	Gastric Cancer Cell Line	FU-97	STAD	-	cell proliferation	CRISPRn	Cas9	CERES	YES
DDX56	Meyers RM (2017)	Glioma Cell Line	H4 neuroglioma	GBMLGG	-	cell proliferation	CRISPRn	Cas9	CERES	YES
DDX56	Meyers RM (2017)	Mammary Gland Tumor Cell Line	HCC-1395	BRCA	-	cell proliferation	CRISPRn	Cas9	CERES	YES
DDX56	Meyers RM (2017)	Mammary Gland Tumor Cell Line	HCC-1937	BRCA	-	cell proliferation	CRISPRn	Cas9	CERES	YES
DDX56	Meyers RM (2017)	Breast Cancer Cell Line	HCC-1954	BRCA	-	cell proliferation	CRISPRn	Cas9	CERES	YES
DDX56	Meyers RM (2017)	Non-Small Cell Lung Adenocarcinoma Cell Line	HCC-827	LUAD	-	cell proliferation	CRISPRn	Cas9	CERES	YES
DDX56	Meyers RM (2017)	Lung Squamous Cell Carcinoma Cell Line	HCC-95	LUSC	-	cell proliferation	CRISPRn	Cas9	CERES	YES
DDX56	Meyers RM (2017)	Non-Small Cell Lung Adenocarcinoma Cell Line	HOP-62	LUAD	-	cell proliferation	CRISPRn	Cas9	CERES	YES
DDX56	Meyers RM (2017)	Pancreatic Cancer Cell Line	HS-766T	PAAD	-	cell proliferation	CRISPRn	Cas9	CERES	YES
DDX56	Meyers RM (2017)	Colonic Cancer Cell Line	HT-115	COAD	-	cell proliferation	CRISPRn	Cas9	CERES	YES
DDX56	Meyers RM (2017)	Urinary Bladder Cancer Cell Line	HT-1197	BLCA	-	cell proliferation	CRISPRn	Cas9	CERES	YES
DDX56	Meyers RM (2017)	Urinary Bladder Cancer Cell Line	HT-1376	BLCA	-	cell proliferation	CRISPRn	Cas9	CERES	YES
DDX56	Meyers RM (2017)	Melanoma Cell Line	ICP-298	SKCM	-	cell proliferation	CRISPRn	Cas9	CERES	YES
DDX56	Meyers RM (2017)	Colonic Cancer Cell Line	KM-12	COAD	-	cell proliferation	CRISPRn	Cas9	CERES	YES
DDX56	Meyers RM (2017)	Melanoma Cell Line	IGR-39	SKCM	-	cell proliferation	CRISPRn	Cas9	CERES	YES
DDX56	Meyers RM (2017)	Colonic Adenocarcinoma Cell Line	HCC-56	COAD	-	cell proliferation	CRISPRn	Cas9	CERES	YES
DDX56	Meyers RM (2017)	Breast Cancer Cell Line	HCC202	BRCA	-	cell proliferation	CRISPRn	Cas9	CERES	YES
DDX56	Meyers RM (2017)	Breast Cancer Cell Line	HCC1143	BRCA	-	cell proliferation	CRISPRn	Cas9	CERES	YES
DDX56	Meyers RM (2017)	Lung Cancer Cell Line	HCC1359	LUAD	-	cell proliferation	CRISPRn	Cas9	CERES	YES
DDX56	Meyers RM (2017)	Breast Cancer Cell Line	HCC1428	BRCA	-	cell proliferation	CRISPRn	Cas9	CERES	YES
DDX56	Meyers RM (2017)	Lung Cancer Cell Line	HCC15	LUAD	-	cell proliferation	CRISPRn	Cas9	CERES	YES
DDX56	Meyers RM (2017)	Gastric Cancer Cell Line	HGC-27	STAD	-	cell proliferation	CRISPRn	Cas9	CERES	YES
DDX56	Meyers RM (2017)	Hepatocellular Carcinoma	HLF	LIHC	-	cell proliferation	CRISPRn	Cas9	CERES	YES
DDX56	Meyers RM (2017)	Breast Cancer Cell Line	HMC-1-8	BRCA	-	cell proliferation	CRISPRn	Cas9	CERES	YES
DDX56	Meyers RM (2017)	Melanoma Cell Line	HS-294T	SKCM	-	cell proliferation	CRISPRn	Cas9	CERES	YES
DDX56	Meyers RM (2017)	Mammary Gland Tumor Cell Line	Hs-578T	BRCA	-	cell proliferation	CRISPRn	Cas9	CERES	YES
DDX56	Meyers RM (2017)	Glioma Cell Line	HS-683	GBMLGG	-	cell proliferation	CRISPRn	Cas9	CERES	YES
DDX56	Meyers RM (2017)	Melanoma Cell Line	Hs 695T	SKCM	-	cell proliferation	CRISPRn	Cas9	CERES	YES
DDX56	Meyers RM (2017)	Melanoma Cell Line	Hs 944.T	SKCM	-	cell proliferation	CRISPRn	Cas9	CERES	YES
DDX56	Meyers RM (2017)	Melanoma Cell Line	HT-144	SKCM	-	cell proliferation	CRISPRn	Cas9	CERES	YES
DDX56	Meyers RM (2017)	Colorectal Cancer Cell Line	HT55	COAD	-	cell proliferation	CRISPRn	Cas9	CERES	YES
DDX56	Meyers RM (2017)	Hepatoma Cell Line	HuH-1	LIHC	-	cell proliferation	CRISPRn	Cas9	CERES	YES
DDX56	Meyers RM (2017)	Hepatoma Cell Line	HuH-7	LIHC	-	cell proliferation	CRISPRn	Cas9	CERES	YES
DDX56	Meyers RM (2017)	Melanoma Cell Line	IGR-1	SKCM	-	cell proliferation	CRISPRn	Cas9	CERES	YES
DDX56	Meyers RM (2017)	Melanoma Cell Line	CJM	SKCM	-	cell proliferation	CRISPRn	Cas9	CERES	YES
DDX56	Meyers RM (2017)	Glioblastoma Cell Line	DK-MG	GBMLGG	-	cell proliferation	CRISPRn	Cas9	CERES	YES
DDX56	Meyers RM (2017)	Colonic Adenocarcinoma Cell Line	DLD-1	COAD	-	cell proliferation	CRISPRn	Cas9	CERES	YES
DDX56	Meyers RM (2017)	Breast Cancer Cell Line	DU4475	BRCA	-	cell proliferation	CRISPRn	Cas9	CERES	YES
DDX56	Meyers RM (2017)	Breast Cancer Cell Line	EFM-19	BRCA	-	cell proliferation	CRISPRn	Cas9	CERES	YES
DDX56	Meyers RM (2017)	Ovary Adenocarcinoma Cell Line	EFO-21	OV	-	cell proliferation	CRISPRn	Cas9	CERES	YES
DDX56	Meyers RM (2017)	Non-Small Cell Lung Adenocarcinoma Cell Line	EKVX	LUAD	-	cell proliferation	CRISPRn	Cas9	CERES	YES
DDX56	Meyers RM (2017)	Endometrial Cancer Cell Line	ESS-1	UCEC	-	cell proliferation	CRISPRn	Cas9	CERES	YES
DDX56	Meyers RM (2017)	Hypopharyngeal Squamous Cell Carcinoma Cell Line	FaDu	HNSC	-	cell proliferation	CRISPRn	Cas9	CERES	YES
DDX56	Meyers RM (2017)	Glioblastoma Cell Line	GaMG	GBMLGG	-	cell proliferation	CRISPRn	Cas9	CERES	YES
DDX56	Meyers RM (2017)	Glioblastoma Cell Line	GB-1	GBMLGG	-	cell proliferation	CRISPRn	Cas9	CERES	YES
DDX56	Meyers RM (2017)	Gastric Adenocarcinoma Cell Line	RCB0555	STAD	-	cell proliferation	CRISPRn	Cas9	CERES	YES
DDX56	Meyers RM (2017)	Gastric Cancer Cell Line	RCB2277	STAD	-	cell proliferation	CRISPRn	Cas9	CERES	YES
DDX56	Meyers RM (2017)	Hepatoma Cell Line	JHH-1	LIHC	-	cell proliferation	CRISPRn	Cas9	CERES	YES
DDX56	Meyers RM (2017)	Hepatoma Cell Line	JHH-4	LIHC	-	cell proliferation	CRISPRn	Cas9	CERES	YES
DDX56	Meyers RM (2017)	Hepatoma Cell Line	JHH-5	LIHC	-	cell proliferation	CRISPRn	Cas9	CERES	YES
DDX56	Meyers RM (2017)	Hepatoma Cell Line	JHH-7	LIHC	-	cell proliferation	CRISPRn	Cas9	CERES	YES
DDX56	Meyers RM (2017)	Ovary Adenocarcinoma Cell Line	JHOC-5 (RCB1520)	OV	-	cell proliferation	CRISPRn	Cas9	CERES	YES
DDX56	Meyers RM (2017)	Ovary Adenocarcinoma Cell Line	JHOM-1 (RCB1676)	OV	-	cell proliferation	CRISPRn	Cas9	CERES	YES
DDX56	Meyers RM (2017)	Ovary Adenocarcinoma Cell Line	JHOS-2 (RCB1521)	OV	-	cell proliferation	CRISPRn	Cas9	CERES	YES
DDX56	Meyers RM (2017)	Ovary Adenocarcinoma Cell Line	JHOS-4 (RCB1678)	OV	-	cell proliferation	CRISPRn	Cas9	CERES	YES
DDX56	Meyers RM (2017)	Mammary Gland Tumor Cell Line	JIMT-1	BRCA	-	cell proliferation	CRISPRn	Cas9	CERES	YES
DDX56	Meyers RM (2017)	Bladder Carcinoma	RCB2227	BLCA	-	cell proliferation	CRISPRn	Cas9	CERES	YES
DDX56	Meyers RM (2017)	Lung Squamous Cell Carcinoma Cell Line	HARA	LUSC	-	cell proliferation	CRISPRn	Cas9	CERES	YES
DDX56	Meyers RM (2017)	Hypopharyngeal Squamous Cell Carcinoma Cell Line	BICR 6	HNSC	-	cell proliferation	CRISPRn	Cas9	CERES	YES
DDX56	Meyers RM (2017)	Endometrial Cancer Cell Line	HEC-251	UCEC	-	cell proliferation	CRISPRn	Cas9	CERES	YES
DDX56	Meyers RM (2017)	Endometrial Cancer Cell Line	HEC-50B	UCEC	-	cell proliferation	CRISPRn	Cas9	CERES	YES
DDX56	Meyers RM (2017)	Endometrial Cancer Cell Line	HEC-59	UCEC	-	cell proliferation	CRISPRn	Cas9	CERES	YES
DDX56	Meyers RM (2017)	Ovarian Cancer Cell Line	HEY A8	OV	-	cell proliferation	CRISPRn	Cas9	CERES	YES
DDX56	Meyers RM (2017)	Melanoma Cell Line	K029AX	SKCM	-	cell proliferation	CRISPRn	Cas9	CERES	YES
DDX56	Meyers RM (2017)	Glioblastoma Cell Line	KALS-1	GBMLGG	-	cell proliferation	CRISPRn	Cas9	CERES	YES
DDX56	Meyers RM (2017)	Endometrial Cancer Cell Line	KLE	UCEC	-	cell proliferation	CRISPRn	Cas9	CERES	YES
DDX56	Meyers RM (2017)	Urinary Bladder Cancer Cell Line	KMBC-2	BLCA	-	cell proliferation	CRISPRn	Cas9	CERES	YES
DDX56	Meyers RM (2017)	Renal Cell Carcinoma Cell Line	KMRC-1	KIRC	-	cell proliferation	CRISPRn	Cas9	CERES	YES
DDX56	Meyers RM (2017)	Renal Cancer Cell Line	KMRC-20	KIRC	-	cell proliferation	CRISPRn	Cas9	CERES	YES
DDX56	Meyers RM (2017)	Glioblastoma Cell Line	KNS-42	GBMLGG	-	cell proliferation	CRISPRn	Cas9	CERES	YES
DDX56	Meyers RM (2017)	Glioma Cell Line	KNS-60	GBMLGG	-	cell proliferation	CRISPRn	Cas9	CERES	YES
DDX56	Meyers RM (2017)	Lung Cancer Cell Line	KNS-62	LUAD	-	cell proliferation	CRISPRn	Cas9	CERES	YES
DDX56	Meyers RM (2017)	Glioma Cell Line	KNS-81	GBMLGG	-	cell proliferation	CRISPRn	Cas9	CERES	YES
DDX56	Meyers RM (2017)	Pancreatic Cancer Cell Line	KP-2	PAAD	-	cell proliferation	CRISPRn	Cas9	CERES	YES
DDX56	Meyers RM (2017)	Pancreatic Cancer Cell Line	KP-3	PAAD	-	cell proliferation	CRISPRn	Cas9	CERES	YES
DDX56	Meyers RM (2017)	Breast Cancer Cell Line	KPL-1	BRCA	-	cell proliferation	CRISPRn	Cas9	CERES	YES
DDX56	Meyers RM (2017)	Glioblastoma Cell Line	KS-1	GBMLGG	-	cell proliferation	CRISPRn	Cas9	CERES	YES
DDX56	Meyers RM (2017)	Bladder Carcinoma	KU-19-19	BLCA	-	cell proliferation	CRISPRn	Cas9	CERES	YES
DDX56	Meyers RM (2017)	Ovarian Cancer Cell Line	KURAMOCHI	OV	-	cell proliferation	CRISPRn	Cas9	CERES	YES
DDX56	Meyers RM (2017)	Esophageal Squamous Cell Carcinoma Cell Line	KYSE-410	ESCA	-	cell proliferation	CRISPRn	Cas9	CERES	YES
DDX56	Meyers RM (2017)	Lung Cancer Cell Line	LCLC-103H	LUAD	-	cell proliferation	CRISPRn	Cas9	CERES	YES
DDX56	Meyers RM (2017)	Hepatocellular Carcinoma	RCB1941	LIHC	-	cell proliferation	CRISPRn	Cas9	CERES	YES
DDX56	Meyers RM (2017)	Lung Squamous Cell Carcinoma Cell Line	LK-2	LUSC	-	cell proliferation	CRISPRn	Cas9	CERES	YES
DDX56	Meyers RM (2017)	Glioblastoma Cell Line	LN-18	GBMLGG	-	cell proliferation	CRISPRn	Cas9	CERES	YES
DDX56	Meyers RM (2017)	Glioblastoma Cell Line	LN-235	GBMLGG	-	cell proliferation	CRISPRn	Cas9	CERES	YES
DDX56	Meyers RM (2017)	Glioblastoma Cell Line	LN-382	GBMLGG	-	cell proliferation	CRISPRn	Cas9	CERES	YES
DDX56	Meyers RM (2017)	Glioblastoma Cell Line	LN-443	GBMLGG	-	cell proliferation	CRISPRn	Cas9	CERES	YES
DDX56	Meyers RM (2017)	Glioblastoma Cell Line	LN-308	GBMLGG	-	cell proliferation	CRISPRn	Cas9	CERES	YES
DDX56	Meyers RM (2017)	Colonic Adenocarcinoma Cell Line	LoVo	COAD	-	cell proliferation	CRISPRn	Cas9	CERES	YES
DDX56	Meyers RM (2017)	Colorectal Adenocarcinoma Cell Line	LS-180	COAD	-	cell proliferation	CRISPRn	Cas9	CERES	YES
DDX56	Meyers RM (2017)	Cecum Cancer Cell Line	LS513	COAD	-	cell proliferation	CRISPRn	Cas9	CERES	YES
DDX56	Meyers RM (2017)	Cecum Cancer Cell Line	LS-1034	COAD	-	cell proliferation	CRISPRn	Cas9	CERES	YES
DDX56	Meyers RM (2017)	Lung Squamous Cell Carcinoma Cell Line	LUDLU-1	LUSC	-	cell proliferation	CRISPRn	Cas9	CERES	YES
DDX56	Meyers RM (2017)	Lung Cancer Cell Line	LXF-289	LUAD	-	cell proliferation	CRISPRn	Cas9	CERES	YES
DDX56	Meyers RM (2017)	Melanoma Cell Line	MALME-3M	SKCM	-	cell proliferation	CRISPRn	Cas9	CERES	YES
DDX56	Meyers RM (2017)	Ovarian Cancer Cell Line	MCAS	OV	-	cell proliferation	CRISPRn	Cas9	CERES	YES
DDX56	Meyers RM (2017)	Breast Cancer Cell Line	MDAMB157	BRCA	-	cell proliferation	CRISPRn	Cas9	CERES	YES
DDX56	Meyers RM (2017)	Breast Adenocarcinoma Cell Line	MDA-MB-231	BRCA	-	cell proliferation	CRISPRn	Cas9	CERES	YES
DDX56	Meyers RM (2017)	Breast Cancer Cell Line	MDAMB415	BRCA	-	cell proliferation	CRISPRn	Cas9	CERES	YES
DDX56	Meyers RM (2017)	Mammary Gland Tumor Cell Line	MDA-MB-436	BRCA	-	cell proliferation	CRISPRn	Cas9	CERES	YES
DDX56	Meyers RM (2017)	Mammary Gland Tumor Cell Line	MDA-MB-453	BRCA	-	cell proliferation	CRISPRn	Cas9	CERES	YES
DDX56	Meyers RM (2017)	Mammary Gland Tumor Cell Line	MDA-MB-468	BRCA	-	cell proliferation	CRISPRn	Cas9	CERES	YES
DDX56	Meyers RM (2017)	Colonic Cancer Cell Line	MDST8	COAD	-	cell proliferation	CRISPRn	Cas9	CERES	YES
DDX56	Meyers RM (2017)	Melanoma Cell Line	MEL-HO	SKCM	-	cell proliferation	CRISPRn	Cas9	CERES	YES
DDX56	Meyers RM (2017)	Melanoma Cell Line	MEL-JUSO	SKCM	-	cell proliferation	CRISPRn	Cas9	CERES	YES
DDX56	Meyers RM (2017)	Endometrial Cancer Cell Line	MFE-319	UCEC	-	cell proliferation	CRISPRn	Cas9	CERES	YES
DDX56	Meyers RM (2017)	Gastric Adenocarcinoma Cell Line	MKN-45	STAD	-	cell proliferation	CRISPRn	Cas9	CERES	YES
DDX56	Meyers RM (2017)	Lung Adenocarcinoma Cell Line	MOR/CPR	LUAD	-	cell proliferation	CRISPRn	Cas9	CERES	YES
DDX56	Meyers RM (2017)	Lung Adenocarcinoma Cell Line	NCI-H23	LUAD	-	cell proliferation	CRISPRn	Cas9	CERES	YES
DDX56	Meyers RM (2017)	Non-Small Cell Lung Cancer Cell Line	NCI-H322	LUAD	-	cell proliferation	CRISPRn	Cas9	CERES	YES
DDX56	Meyers RM (2017)	Lung Adenocarcinoma Cell Line	NCI-H441	LUAD	-	cell proliferation	CRISPRn	Cas9	CERES	YES
DDX56	Meyers RM (2017)	Non-Small Cell Lung Cancer Cell Line	NCI-H520	LUAD	-	cell proliferation	CRISPRn	Cas9	CERES	YES
DDX56	Meyers RM (2017)	Cecum Cancer Cell Line	NCI-H716	COAD	-	cell proliferation	CRISPRn	Cas9	CERES	YES
DDX56	Meyers RM (2017)	Colonic Cancer Cell Line	NCI-H747	COAD	-	cell proliferation	CRISPRn	Cas9	CERES	YES
DDX56	Meyers RM (2017)	Lung Adenocarcinoma Cell Line	NCI-H838	LUAD	-	cell proliferation	CRISPRn	Cas9	CERES	YES
DDX56	Meyers RM (2017)	Non-Small Cell Lung Cancer Cell Line	NCI-H1299	LUAD	-	cell proliferation	CRISPRn	Cas9	CERES	YES
DDX56	Meyers RM (2017)	Lung Adenocarcinoma Cell Line	NCI-H1437	LUAD	-	cell proliferation	CRISPRn	Cas9	CERES	YES
DDX56	Meyers RM (2017)	Non-Small Cell Lung Cancer Cell Line	NCI-H1581	LUAD	-	cell proliferation	CRISPRn	Cas9	CERES	YES
DDX56	Meyers RM (2017)	Lung Adenocarcinoma Cell Line	NCI-H1650	LUAD	-	cell proliferation	CRISPRn	Cas9	CERES	YES
DDX56	Meyers RM (2017)	Lung Cancer Cell Line	NCI-H1693	LUAD	-	cell proliferation	CRISPRn	Cas9	CERES	YES
DDX56	Meyers RM (2017)	Non-Small Cell Lung Cancer Cell Line	NCI-H1703	LUAD	-	cell proliferation	CRISPRn	Cas9	CERES	YES
DDX56	Meyers RM (2017)	Lung Cancer Cell Line	NCI-H1792	LUAD	-	cell proliferation	CRISPRn	Cas9	CERES	YES
DDX56	Meyers RM (2017)	Lung Cancer Cell Line	NCI-H1944	LUAD	-	cell proliferation	CRISPRn	Cas9	CERES	YES
DDX56	Meyers RM (2017)	Lung Cancer Cell Line	NCI-H2023	LUAD	-	cell proliferation	CRISPRn	Cas9	CERES	YES
DDX56	Meyers RM (2017)	Lung Cancer Cell Line	NCI-H2030	LUAD	-	cell proliferation	CRISPRn	Cas9	CERES	YES
DDX56	Meyers RM (2017)	Lung Adenocarcinoma Cell Line	NCI-H2087	LUAD	-	cell proliferation	CRISPRn	Cas9	CERES	YES
DDX56	Meyers RM (2017)	Lung Cancer Cell Line	NCI-H2110	LUAD	-	cell proliferation	CRISPRn	Cas9	CERES	YES
DDX56	Meyers RM (2017)	Non-Small Cell Lung Cancer Cell Line	NCI-H2122	LUAD	-	cell proliferation	CRISPRn	Cas9	CERES	YES
DDX56	Meyers RM (2017)	Lung Adenocarcinoma Cell Line	NCI-H2126	LUAD	-	cell proliferation	CRISPRn	Cas9	CERES	YES
DDX56	Meyers RM (2017)	Lung Squamous Cell Carcinoma Cell Line	NCI-H2170	LUSC	-	cell proliferation	CRISPRn	Cas9	CERES	YES
DDX56	Meyers RM (2017)	Lung Cancer Cell Line	NCI-H2172	LUAD	-	cell proliferation	CRISPRn	Cas9	CERES	YES
DDX56	Meyers RM (2017)	Lung Adenocarcinoma Cell Line	NCI-H2291	LUAD	-	cell proliferation	CRISPRn	Cas9	CERES	YES
DDX56	Meyers RM (2017)	Gastric Cancer Cell Line	NCI-N87	STAD	-	cell proliferation	CRISPRn	Cas9	CERES	YES
DDX56	Meyers RM (2017)	Gastric Adenocarcinoma Cell Line	NUGC-3	STAD	-	cell proliferation	CRISPRn	Cas9	CERES	YES
DDX56	Meyers RM (2017)	Ovary Adenocarcinoma Cell Line	OAW28	OV	-	cell proliferation	CRISPRn	Cas9	CERES	YES
DDX56	Meyers RM (2017)	Esophageal Cancer Cell Line	OE-21	ESCA	-	cell proliferation	CRISPRn	Cas9	CERES	YES
DDX56	Meyers RM (2017)	Esophageal Cancer Cell Line	OE-33	ESCA	-	cell proliferation	CRISPRn	Cas9	CERES	YES
DDX56	Meyers RM (2017)	Renal Cell Carcinoma Cell Line	OS-RC-2	KIRC	-	cell proliferation	CRISPRn	Cas9	CERES	YES
DDX56	Meyers RM (2017)	Colonic Cancer Cell Line	OUMS-23	COAD	-	cell proliferation	CRISPRn	Cas9	CERES	YES
DDX56	Meyers RM (2017)	Ovarian Cancer Cell Line	OV7	OV	-	cell proliferation	CRISPRn	Cas9	CERES	YES
DDX56	Meyers RM (2017)	Ovary Adenocarcinoma Cell Line	OV-90	OV	-	cell proliferation	CRISPRn	Cas9	CERES	YES
DDX56	Meyers RM (2017)	Ovarian Cancer Cell Line	OVCA-8	OV	-	cell proliferation	CRISPRn	Cas9	CERES	YES
DDX56	Meyers RM (2017)	Ovary Adenocarcinoma Cell Line	OVISE	OV	-	cell proliferation	CRISPRn	Cas9	CERES	YES
DDX56	Meyers RM (2017)	Ovarian Cancer Cell Line	OVK-18 (RCB1903)	OV	-	cell proliferation	CRISPRn	Cas9	CERES	YES
DDX56	Meyers RM (2017)	Ovary Adenocarcinoma Cell Line	OVMANA	OV	-	cell proliferation	CRISPRn	Cas9	CERES	YES
DDX56	Meyers RM (2017)	Ovary Adenocarcinoma Cell Line	OVTOKO	OV	-	cell proliferation	CRISPRn	Cas9	CERES	YES
DDX56	Meyers RM (2017)	Pancreatic Ductal Adenocarcinoma Cell Line	Panc 10.05	PAAD	-	cell proliferation	CRISPRn	Cas9	CERES	YES
DDX56	Meyers RM (2017)	Lung Adenocarcinoma Cell Line	PC-14	LUAD	-	cell proliferation	CRISPRn	Cas9	CERES	YES
DDX56	Meyers RM (2017)	Pancreatic Ductal Adenocarcinoma Cell Line	PK-1	PAAD	-	cell proliferation	CRISPRn	Cas9	CERES	YES
DDX56	Meyers RM (2017)	Hepatoma Cell Line	PLC-PRF-5	LIHC	-	cell proliferation	CRISPRn	Cas9	CERES	YES
DDX56	Meyers RM (2017)	Pancreatic Adenocarcinoma Cell Line	PSN-1	PAAD	-	cell proliferation	CRISPRn	Cas9	CERES	YES
DDX56	Meyers RM (2017)	Renal Cell Carcinoma Cell Line	RCC-10RGB	KIRC	-	cell proliferation	CRISPRn	Cas9	CERES	YES
DDX56	Meyers RM (2017)	Lung Adenocarcinoma Cell Line	RERF-LC-Ad1	LUAD	-	cell proliferation	CRISPRn	Cas9	CERES	YES
DDX56	Meyers RM (2017)	Lung Squamous Cell Carcinoma Cell Line	RCB0444	LUSC	-	cell proliferation	CRISPRn	Cas9	CERES	YES
DDX56	Meyers RM (2017)	Colonic Cancer Cell Line	RKO	COAD	-	cell proliferation	CRISPRn	Cas9	CERES	YES
DDX56	Meyers RM (2017)	Ovarian Cancer Cell Line	RMUG-S	OV	-	cell proliferation	CRISPRn	Cas9	CERES	YES
DDX56	Meyers RM (2017)	Melanoma Cell Line	RPMI-7951	SKCM	-	cell proliferation	CRISPRn	Cas9	CERES	YES
DDX56	Meyers RM (2017)	Bladder Transitional Cell Carcinoma Cell Line	RT-4	BLCA	-	cell proliferation	CRISPRn	Cas9	CERES	YES
DDX56	Meyers RM (2017)	Bladder Transitional Cell Carcinoma Cell Line	RT-112	BLCA	-	cell proliferation	CRISPRn	Cas9	CERES	YES
DDX56	Meyers RM (2017)	Bladder Carcinoma	RT112/84	BLCA	-	cell proliferation	CRISPRn	Cas9	CERES	YES
DDX56	Meyers RM (2017)	Melanoma Cell Line	RVH-421	SKCM	-	cell proliferation	CRISPRn	Cas9	CERES	YES
DDX56	Meyers RM (2017)	Urinary Bladder Squamous Cell Carcinoma Cell Line	SCaBER	BLCA	-	cell proliferation	CRISPRn	Cas9	CERES	YES
DDX56	Meyers RM (2017)	Glioblastoma Cell Line	SF-295	GBMLGG	-	cell proliferation	CRISPRn	Cas9	CERES	YES
DDX56	Meyers RM (2017)	Glioblastoma Cell Line	SF767	GBMLGG	-	cell proliferation	CRISPRn	Cas9	CERES	YES
DDX56	Meyers RM (2017)	Gastric Adenocarcinoma Cell Line	SH-10-TC	STAD	-	cell proliferation	CRISPRn	Cas9	CERES	YES
DDX56	Meyers RM (2017)	Breast Adenocarcinoma Cell Line	SK-BR-3	BRCA	-	cell proliferation	CRISPRn	Cas9	CERES	YES
DDX56	Meyers RM (2017)	Hepatoma Cell Line	SK-HEP-1	LIHC	-	cell proliferation	CRISPRn	Cas9	CERES	YES
DDX56	Meyers RM (2017)	Melanoma Cell Line	SK-MEL-24	SKCM	-	cell proliferation	CRISPRn	Cas9	CERES	YES
DDX56	Meyers RM (2017)	Melanoma Cell Line	SK-MEL-30	SKCM	-	cell proliferation	CRISPRn	Cas9	CERES	YES
DDX56	Meyers RM (2017)	Lung Squamous Cell Carcinoma Cell Line	SK-MES-1	LUSC	-	cell proliferation	CRISPRn	Cas9	CERES	YES
DDX56	Meyers RM (2017)	Ovary Adenocarcinoma Cell Line	SKOV-3	OV	-	cell proliferation	CRISPRn	Cas9	CERES	YES
DDX56	Meyers RM (2017)	Bladder Carcinoma	SLR 20	BLCA	-	cell proliferation	CRISPRn	Cas9	CERES	YES
DDX56	Meyers RM (2017)	Renal Cell Carcinoma Cell Line	SLR 26	KIRC	-	cell proliferation	CRISPRn	Cas9	CERES	YES
DDX56	Meyers RM (2017)	Endometrial Cancer Cell Line	SNG-M	UCEC	-	cell proliferation	CRISPRn	Cas9	CERES	YES
DDX56	Meyers RM (2017)	Gastric Cancer Cell Line	SNU-1	STAD	-	cell proliferation	CRISPRn	Cas9	CERES	YES
DDX56	Meyers RM (2017)	Ovarian Cancer Cell Line	SNU-8	OV	-	cell proliferation	CRISPRn	Cas9	CERES	YES
DDX56	Meyers RM (2017)	Glioma Cell Line	SNU-201	GBMLGG	-	cell proliferation	CRISPRn	Cas9	CERES	YES
DDX56	Meyers RM (2017)	Pancreatic Adenocarcinoma Cell Line	SNU-213	PAAD	-	cell proliferation	CRISPRn	Cas9	CERES	YES
DDX56	Meyers RM (2017)	Renal Cell Carcinoma Cell Line	SNU-349	KIRC	-	cell proliferation	CRISPRn	Cas9	CERES	YES
DDX56	Meyers RM (2017)	Hepatoma Cell Line	SNU-398	LIHC	-	cell proliferation	CRISPRn	Cas9	CERES	YES
DDX56	Meyers RM (2017)	Pancreatic Adenocarcinoma Cell Line	SNU-410	PAAD	-	cell proliferation	CRISPRn	Cas9	CERES	YES
DDX56	Meyers RM (2017)	Hepatoma Cell Line	SNU-449	LIHC	-	cell proliferation	CRISPRn	Cas9	CERES	YES
DDX56	Meyers RM (2017)	Ovarian Cancer Cell Line	SNU-840	OV	-	cell proliferation	CRISPRn	Cas9	CERES	YES
DDX56	Meyers RM (2017)	Pancreatic Cancer Cell Line	SUIT-2	PAAD	-	cell proliferation	CRISPRn	Cas9	CERES	YES
DDX56	Meyers RM (2017)	Colorectal Adenocarcinoma Cell Line	SW-48	COAD	-	cell proliferation	CRISPRn	Cas9	CERES	YES
DDX56	Meyers RM (2017)	Colonic Adenocarcinoma Cell Line	SW-403	COAD	-	cell proliferation	CRISPRn	Cas9	CERES	YES
DDX56	Meyers RM (2017)	Colonic Adenocarcinoma Cell Line	SW-620	COAD	-	cell proliferation	CRISPRn	Cas9	CERES	YES
DDX56	Meyers RM (2017)	Colonic Cancer Cell Line	SW837	COAD	-	cell proliferation	CRISPRn	Cas9	CERES	YES
DDX56	Meyers RM (2017)	Colonic Cancer Cell Line	SW1463	COAD	-	cell proliferation	CRISPRn	Cas9	CERES	YES
DDX56	Meyers RM (2017)	Pancreatic Adenocarcinoma Cell Line	T3M4	PAAD	-	cell proliferation	CRISPRn	Cas9	CERES	YES
DDX56	Meyers RM (2017)	Urinary Bladder Cancer Cell Line	T-24	BLCA	-	cell proliferation	CRISPRn	Cas9	CERES	YES
DDX56	Meyers RM (2017)	Colonic Cancer Cell Line	T-84	COAD	-	cell proliferation	CRISPRn	Cas9	CERES	YES
DDX56	Meyers RM (2017)	Glioblastoma Cell Line	T-98G	GBMLGG	-	cell proliferation	CRISPRn	Cas9	CERES	YES
DDX56	Meyers RM (2017)	Bladder Carcinoma	TCCSUP	BLCA	-	cell proliferation	CRISPRn	Cas9	CERES	YES
DDX56	Meyers RM (2017)	Esophageal Squamous Cell Carcinoma Cell Line	TE-1	ESCA	-	cell proliferation	CRISPRn	Cas9	CERES	YES
DDX56	Meyers RM (2017)	Esophageal Squamous Cell Carcinoma Cell Line	TE-5 (RCB1949)	ESCA	-	cell proliferation	CRISPRn	Cas9	CERES	YES
DDX56	Meyers RM (2017)	Endometrial Cancer Cell Line	RCB1433	UCEC	-	cell proliferation	CRISPRn	Cas9	CERES	YES
DDX56	Meyers RM (2017)	Ovarian Cancer Cell Line	TOV-21G	OV	-	cell proliferation	CRISPRn	Cas9	CERES	YES
DDX56	Meyers RM (2017)	Glioblastoma Cell Line	U-118MG	GBMLGG	-	cell proliferation	CRISPRn	Cas9	CERES	YES
DDX56	Meyers RM (2017)	Glioma Cell Line	U-178MG	GBMLGG	-	cell proliferation	CRISPRn	Cas9	CERES	YES
DDX56	Meyers RM (2017)	Renal Cell Carcinoma Cell Line	UOK101	KIRC	-	cell proliferation	CRISPRn	Cas9	CERES	YES
DDX56	Meyers RM (2017)	Melanoma Cell Line	WM1799	SKCM	-	cell proliferation	CRISPRn	Cas9	CERES	YES
DDX56	Meyers RM (2017)	Melanoma Cell Line	C32	SKCM	-	cell proliferation	CRISPRn	Cas9	CERES	YES
DDX56	Meyers RM (2017)	Renal Cell Carcinoma Cell Line	Caki-1	KIRC	-	cell proliferation	CRISPRn	Cas9	CERES	YES
DDX56	Meyers RM (2017)	Breast Adenocarcinoma Cell Line	CAL-51	BRCA	-	cell proliferation	CRISPRn	Cas9	CERES	YES
DDX56	Meyers RM (2017)	Esophageal Squamous Cell Carcinoma Cell Line	KYSE-30	ESCA	-	cell proliferation	CRISPRn	Cas9	CERES	YES
DDX56	Meyers RM (2017)	Endometrial Cancer Cell Line	HEC-6	UCEC	-	cell proliferation	CRISPRn	Cas9	CERES	YES
DDX56	Meyers RM (2017)	Lung Cancer Cell Line	Calu-6	LUAD	-	cell proliferation	CRISPRn	Cas9	CERES	YES
DDX56	Meyers RM (2017)	Breast Adenocarcinoma Cell Line	CAMA-1	BRCA	-	cell proliferation	CRISPRn	Cas9	CERES	YES
DDX56	Meyers RM (2017)	Glioblastoma Cell Line	CAS-1	GBMLGG	-	cell proliferation	CRISPRn	Cas9	CERES	YES
DDX56	Meyers RM (2017)	Colonic Adenocarcinoma Cell Line	CCK-81	COAD	-	cell proliferation	CRISPRn	Cas9	CERES	YES
DDX56	Meyers RM (2017)	Lung Cancer Cell Line	ChaGo-K-1	LUAD	-	cell proliferation	CRISPRn	Cas9	CERES	YES
DDX56	Meyers RM (2017)	Colorectal Cancer Cell Line	CL-40	COAD	-	cell proliferation	CRISPRn	Cas9	CERES	YES
DDX56	Meyers RM (2017)	Colonic Cancer Cell Line	Colo-678	COAD	-	cell proliferation	CRISPRn	Cas9	CERES	YES
DDX56	Meyers RM (2017)	Melanoma Cell Line	COLO 679	SKCM	-	cell proliferation	CRISPRn	Cas9	CERES	YES
DDX56	Meyers RM (2017)	Melanoma Cell Line	COLO 792	SKCM	-	cell proliferation	CRISPRn	Cas9	CERES	YES
DDX56	Meyers RM (2017)	Melanoma Cell Line	COLO 800	SKCM	-	cell proliferation	CRISPRn	Cas9	CERES	YES
DDX56	Meyers RM (2017)	Lung Cancer Cell Line	COR-L47	LUAD	-	cell proliferation	CRISPRn	Cas9	CERES	YES
DDX56	Meyers RM (2017)	Lung Cancer Cell Line	CORL279	LUAD	-	cell proliferation	CRISPRn	Cas9	CERES	YES
DDX56	Meyers RM (2017)	Ovarian Cancer Cell Line	COV318	OV	-	cell proliferation	CRISPRn	Cas9	CERES	YES
DDX56	Meyers RM (2017)	Ovarian Cancer Cell Line	COV434	OV	-	cell proliferation	CRISPRn	Cas9	CERES	YES
DDX56	Meyers RM (2017)	Ovarian Cancer Cell Line	COV504	OV	-	cell proliferation	CRISPRn	Cas9	CERES	YES
DDX56	Meyers RM (2017)	Bladder Carcinoma	CAL-29	BLCA	-	cell proliferation	CRISPRn	Cas9	CERES	YES
DDX56	Aguirre AJ (2016)	Melanoma Cell Line	A-375	SKCM	-	cell proliferation	CRISPRn	Cas9	CERES	YES
DDX56	Aguirre AJ (2016)	Pancreatic Adenocarcinoma Cell Line	BxPC-3	PAAD	-	cell proliferation	CRISPRn	Cas9	CERES	YES
DDX56	Aguirre AJ (2016)	Breast Cancer Cell Line	CAL120	BRCA	-	cell proliferation	CRISPRn	Cas9	CERES	YES
DDX56	Aguirre AJ (2016)	Lung Cancer Cell Line	CORL105	LUAD	-	cell proliferation	CRISPRn	Cas9	CERES	YES
DDX56	Aguirre AJ (2016)	Renal Cancer Cell Line	G-402	KIRC	-	cell proliferation	CRISPRn	Cas9	CERES	YES
DDX56	Aguirre AJ (2016)	Lung Cancer Cell Line	HCC44	LUAD	-	cell proliferation	CRISPRn	Cas9	CERES	YES
DDX56	Aguirre AJ (2016)	Melanoma Cell Line	HS-294T	SKCM	-	cell proliferation	CRISPRn	Cas9	CERES	YES
DDX56	Aguirre AJ (2016)	Colonic Adenocarcinoma Cell Line	HT-29	COAD	-	cell proliferation	CRISPRn	Cas9	CERES	YES
DDX56	Aguirre AJ (2016)	Pancreatic Cancer Cell Line	L3.3	PAAD	-	cell proliferation	CRISPRn	Cas9	CERES	YES
DDX56	Aguirre AJ (2016)	Prostate Cancer Cell Line	LNCaP	PRAD	-	cell proliferation	CRISPRn	Cas9	CERES	YES
DDX56	Aguirre AJ (2016)	Melanoma Cell Line	MEWO	SKCM	-	cell proliferation	CRISPRn	Cas9	CERES	YES
DDX56	Aguirre AJ (2016)	Lung Cancer Cell Line	NCI-H1373	LUAD	-	cell proliferation	CRISPRn	Cas9	CERES	YES
DDX56	Aguirre AJ (2016)	Lung Cancer Cell Line	NCI-H2009	LUAD	-	cell proliferation	CRISPRn	Cas9	CERES	YES
DDX56	Aguirre AJ (2016)	Pancreatic Cancer Cell Line	PANC-1	PAAD	-	cell proliferation	CRISPRn	Cas9	CERES	YES
DDX56	Aguirre AJ (2016)	Prostate Cancer Cell Line	PC-3	PRAD	-	cell proliferation	CRISPRn	Cas9	CERES	YES
DDX56	Aguirre AJ (2016)	Pancreatic Ductal Adenocarcinoma Cell Line	SU.86.86	PAAD	-	cell proliferation	CRISPRn	Cas9	CERES	YES
DDX56	Aguirre AJ (2016)	Breast Cancer Cell Line	T-47D	BRCA	-	cell proliferation	CRISPRn	Cas9	CERES	YES
DDX56	Aguirre AJ (2016)	Ovarian Cancer Cell Line	TOV-112D	OV	-	cell proliferation	CRISPRn	Cas9	CERES	YES
DDX56	Aguirre AJ (2016)	Colorectal Cancer Cell Line	COLO 741	COAD	-	cell proliferation	CRISPRn	Cas9	CERES	YES
DDX56	Toledo CM (2015)	Glioblastoma Cell Line	GSC-0131	GBMLGG	-	cell proliferation	CRISPRn	Cas9	BAGEL	YES
DDX56	Toledo CM (2015)	Glioblastoma Cell Line	GSC-0827	GBMLGG	-	cell proliferation	CRISPRn	Cas9	BAGEL	YES
DDX56	Doench JG (2016)	Melanoma Cell Line	A-375	SKCM	-	cell proliferation	CRISPRn	Cas9	STARS	YES
DDX56	Doench JG (2016)	Colonic Adenocarcinoma Cell Line	HT-29	COAD	-	cell proliferation	CRISPRn	Cas9	STARS	YES
DDX56	Doench JG (2016)	Melanoma Cell Line	A-375	SKCM	-	cell proliferation	CRISPRn	Cas9	STARS	YES
DDX56	Patel SJ (2017)	Melanoma Cell Line	624-mel	SKCM	-	cell proliferation	CRISPRn	Cas9	RIGER	YES
DDX56	Martin TD (2017)	Colonic Adenocarcinoma Cell Line	DLD-1	COAD	-	cell proliferation	CRISPRn	Cas9	EdgeR	YES
DDX56	Behan FM (2019)	Prostate Cancer Cell Line	22RV1	PRAD	-	cell proliferation	CRISPRn	Cas9	BAGEL	YES
DDX56	Behan FM (2019)	Gastric Adenocarcinoma Cell Line	23132-87	STAD	-	cell proliferation	CRISPRn	Cas9	BAGEL	YES
DDX56	Behan FM (2019)	Glioblastoma Cell Line	42-MG-BA	GBMLGG	-	cell proliferation	CRISPRn	Cas9	BAGEL	YES
DDX56	Behan FM (2019)	Glioblastoma Cell Line	8-MG-BA	GBMLGG	-	cell proliferation	CRISPRn	Cas9	BAGEL	YES
DDX56	Behan FM (2019)	Melanoma Cell Line	A2058	SKCM	-	cell proliferation	CRISPRn	Cas9	BAGEL	YES
DDX56	Behan FM (2019)	Ovarian Cancer Cell Line	A2780	OV	-	cell proliferation	CRISPRn	Cas9	BAGEL	YES
DDX56	Behan FM (2019)	Ovary Adenocarcinoma Cell Line	A2780ADR	OV	-	cell proliferation	CRISPRn	Cas9	BAGEL	YES
DDX56	Behan FM (2019)	Ovary Adenocarcinoma Cell Line	A2780cis	OV	-	cell proliferation	CRISPRn	Cas9	BAGEL	YES
DDX56	Behan FM (2019)	Melanoma Cell Line	A-375	SKCM	-	cell proliferation	CRISPRn	Cas9	BAGEL	YES
DDX56	Behan FM (2019)	Lung Cancer Cell Line	A549	LUAD	-	cell proliferation	CRISPRn	Cas9	BAGEL	YES
DDX56	Behan FM (2019)	Gastric Adenocarcinoma Cell Line	AGS	STAD	-	cell proliferation	CRISPRn	Cas9	BAGEL	YES
DDX56	Behan FM (2019)	Glioblastoma Cell Line	AM-38	GBMLGG	-	cell proliferation	CRISPRn	Cas9	BAGEL	YES
DDX56	Behan FM (2019)	Pancreatic Adenocarcinoma Cell Line	AsPC1	PAAD	-	cell proliferation	CRISPRn	Cas9	BAGEL	YES
DDX56	Behan FM (2019)	Breast Cancer Cell Line	AU-565	BRCA	-	cell proliferation	CRISPRn	Cas9	BAGEL	YES
DDX56	Behan FM (2019)	Head and Neck Squamous Cell Carcinoma Cell Line	BB30-HNC	HNSC	-	cell proliferation	CRISPRn	Cas9	BAGEL	YES
DDX56	Behan FM (2019)	Pancreatic Adenocarcinoma Cell Line	BxPC-3	PAAD	-	cell proliferation	CRISPRn	Cas9	BAGEL	YES
DDX56	Behan FM (2019)	Colorectal Cancer Cell Line	C2BBe1	COAD	-	cell proliferation	CRISPRn	Cas9	BAGEL	YES
DDX56	Behan FM (2019)	Breast Adenocarcinoma Cell Line	CAL-51	BRCA	-	cell proliferation	CRISPRn	Cas9	BAGEL	YES
DDX56	Behan FM (2019)	Pancreatic Ductal Adenocarcinoma Cell Line	CAPAN-1	PAAD	-	cell proliferation	CRISPRn	Cas9	BAGEL	YES
DDX56	Behan FM (2019)	Glioblastoma Cell Line	CAS-1	GBMLGG	-	cell proliferation	CRISPRn	Cas9	BAGEL	YES
DDX56	Behan FM (2019)	Colorectal Cancer Cell Line	CL-11	COAD	-	cell proliferation	CRISPRn	Cas9	BAGEL	YES
DDX56	Behan FM (2019)	Colonic Adenocarcinoma Cell Line	COLO-205	COAD	-	cell proliferation	CRISPRn	Cas9	BAGEL	YES
DDX56	Behan FM (2019)	Colonic Adenocarcinoma Cell Line	COLO-320-HSR	COAD	-	cell proliferation	CRISPRn	Cas9	BAGEL	YES
DDX56	Behan FM (2019)	Colonic Cancer Cell Line	Colo-678	COAD	-	cell proliferation	CRISPRn	Cas9	BAGEL	YES
DDX56	Behan FM (2019)	Esophageal Cancer Cell Line	COLO-680N	ESCA	-	cell proliferation	CRISPRn	Cas9	BAGEL	YES
DDX56	Behan FM (2019)	Endometrial Cancer Cell Line	COLO-684	UCEC	-	cell proliferation	CRISPRn	Cas9	BAGEL	YES
DDX56	Behan FM (2019)	Breast Cancer Cell Line	COLO-824	BRCA	-	cell proliferation	CRISPRn	Cas9	BAGEL	YES
DDX56	Behan FM (2019)	Glioblastoma Cell Line	D-423MG	GBMLGG	-	cell proliferation	CRISPRn	Cas9	BAGEL	YES
DDX56	Behan FM (2019)	Glioblastoma Cell Line	D-502MG	GBMLGG	-	cell proliferation	CRISPRn	Cas9	BAGEL	YES
DDX56	Behan FM (2019)	Glioblastoma Cell Line	D-542MG	GBMLGG	-	cell proliferation	CRISPRn	Cas9	BAGEL	YES
DDX56	Behan FM (2019)	Glioblastoma Cell Line	DBTRG-05MG	GBMLGG	-	cell proliferation	CRISPRn	Cas9	BAGEL	YES
DDX56	Behan FM (2019)	Colorectal Cancer Cell Line	NICR402 (DiFi)	COAD	-	cell proliferation	CRISPRn	Cas9	BAGEL	YES
DDX56	Behan FM (2019)	Glioblastoma Cell Line	DK-MG	GBMLGG	-	cell proliferation	CRISPRn	Cas9	BAGEL	YES
DDX56	Behan FM (2019)	Ovarian Cancer Cell Line	DOV13	OV	-	cell proliferation	CRISPRn	Cas9	BAGEL	YES
DDX56	Behan FM (2019)	Prostate Cancer Cell Line	DU-145	PRAD	-	cell proliferation	CRISPRn	Cas9	BAGEL	YES
DDX56	Behan FM (2019)	Lung Squamous Cell Carcinoma Cell Line	EBC-1	LUSC	-	cell proliferation	CRISPRn	Cas9	BAGEL	YES
DDX56	Behan FM (2019)	Esophageal Squamous Cell Carcinoma Cell Line	RCB0774 (EC-GI-10)	ESCA	-	cell proliferation	CRISPRn	Cas9	BAGEL	YES
DDX56	Behan FM (2019)	Ovary Adenocarcinoma Cell Line	EFO-21	OV	-	cell proliferation	CRISPRn	Cas9	BAGEL	YES
DDX56	Behan FM (2019)	Ovary Adenocarcinoma Cell Line	EFO-27	OV	-	cell proliferation	CRISPRn	Cas9	BAGEL	YES
DDX56	Behan FM (2019)	Cholangiocarcinoma Cell	EGI-1	CHOL	-	cell proliferation	CRISPRn	Cas9	BAGEL	YES
DDX56	Behan FM (2019)	Ovarian Cancer Cell Line	ES-2	OV	-	cell proliferation	CRISPRn	Cas9	BAGEL	YES
DDX56	Behan FM (2019)	Esophageal Cancer Cell Line	ESO26	ESCA	-	cell proliferation	CRISPRn	Cas9	BAGEL	YES
DDX56	Behan FM (2019)	Esophageal Cancer Cell Line	ESO51	ESCA	-	cell proliferation	CRISPRn	Cas9	BAGEL	YES
DDX56	Behan FM (2019)	Endometrial Cancer Cell Line	ESS-1	UCEC	-	cell proliferation	CRISPRn	Cas9	BAGEL	YES
DDX56	Behan FM (2019)	Breast Cancer Cell Line	EVSA-T	BRCA	-	cell proliferation	CRISPRn	Cas9	BAGEL	YES
DDX56	Behan FM (2019)	Hypopharyngeal Squamous Cell Carcinoma Cell Line	FaDu	HNSC	-	cell proliferation	CRISPRn	Cas9	BAGEL	YES
DDX56	Behan FM (2019)	Esophageal Cancer Cell Line	FLO-1	ESCA	-	cell proliferation	CRISPRn	Cas9	BAGEL	YES
DDX56	Behan FM (2019)	Glioblastoma Cell Line	GaMG	GBMLGG	-	cell proliferation	CRISPRn	Cas9	BAGEL	YES
DDX56	Behan FM (2019)	Glioblastoma Cell Line	GB-1	GBMLGG	-	cell proliferation	CRISPRn	Cas9	BAGEL	YES
DDX56	Behan FM (2019)	Lung Squamous Cell Carcinoma Cell Line	HARA	LUSC	-	cell proliferation	CRISPRn	Cas9	BAGEL	YES
DDX56	Behan FM (2019)	Lung Cancer Cell Line	HCC15	LUAD	-	cell proliferation	CRISPRn	Cas9	BAGEL	YES
DDX56	Behan FM (2019)	Lung Cancer Cell Line	HCC-78	LUAD	-	cell proliferation	CRISPRn	Cas9	BAGEL	YES
DDX56	Behan FM (2019)	Breast Cancer Cell Line	HCC1143	BRCA	-	cell proliferation	CRISPRn	Cas9	BAGEL	YES
DDX56	Behan FM (2019)	Breast Cancer Cell Line	HCC1187	BRCA	-	cell proliferation	CRISPRn	Cas9	BAGEL	YES
DDX56	Behan FM (2019)	Mammary Gland Tumor Cell Line	HCC-1395	BRCA	-	cell proliferation	CRISPRn	Cas9	BAGEL	YES
DDX56	Behan FM (2019)	Mammary Gland Tumor Cell Line	HCC-1937	BRCA	-	cell proliferation	CRISPRn	Cas9	BAGEL	YES
DDX56	Behan FM (2019)	Breast Cancer Cell Line	HCC-1954	BRCA	-	cell proliferation	CRISPRn	Cas9	BAGEL	YES
DDX56	Behan FM (2019)	Colonic Cancer Cell Line	HCC2998	COAD	-	cell proliferation	CRISPRn	Cas9	BAGEL	YES
DDX56	Behan FM (2019)	Mammary Gland Tumor Cell Line	HCC38	BRCA	-	cell proliferation	CRISPRn	Cas9	BAGEL	YES
DDX56	Behan FM (2019)	Breast Cancer Cell Line	HCC70	BRCA	-	cell proliferation	CRISPRn	Cas9	BAGEL	YES
DDX56	Behan FM (2019)	Esophageal Cancer Cell Line	HCE-4	ESCA	-	cell proliferation	CRISPRn	Cas9	BAGEL	YES
DDX56	Behan FM (2019)	Colorectal Cancer Cell Line	HCT-116	COAD	-	cell proliferation	CRISPRn	Cas9	BAGEL	YES
DDX56	Behan FM (2019)	Colonic Cancer Cell Line	HCT-15	COAD	-	cell proliferation	CRISPRn	Cas9	BAGEL	YES
DDX56	Behan FM (2019)	Endometrial Cancer Cell Line	HEC-1	UCEC	-	cell proliferation	CRISPRn	Cas9	BAGEL	YES
DDX56	Behan FM (2019)	Ovarian Cancer Cell Line	Hey	OV	-	cell proliferation	CRISPRn	Cas9	BAGEL	YES
DDX56	Behan FM (2019)	Gastric Cancer Cell Line	HGC-27	STAD	-	cell proliferation	CRISPRn	Cas9	BAGEL	YES
DDX56	Behan FM (2019)	Non-Small Cell Lung Adenocarcinoma Cell Line	HOP-62	LUAD	-	cell proliferation	CRISPRn	Cas9	BAGEL	YES
DDX56	Behan FM (2019)	Pancreatic Adenocarcinoma Cell Line	HPAF-2	PAAD	-	cell proliferation	CRISPRn	Cas9	BAGEL	YES
DDX56	Behan FM (2019)	Mammary Gland Tumor Cell Line	Hs-578T	BRCA	-	cell proliferation	CRISPRn	Cas9	BAGEL	YES
DDX56	Behan FM (2019)	Glioma Cell Line	HS-683	GBMLGG	-	cell proliferation	CRISPRn	Cas9	BAGEL	YES
DDX56	Behan FM (2019)	Gastric Adenocarcinoma Cell Line	HSC-39	STAD	-	cell proliferation	CRISPRn	Cas9	BAGEL	YES
DDX56	Behan FM (2019)	Colonic Cancer Cell Line	HT-29v1.0	COAD	-	cell proliferation	CRISPRn	Cas9	BAGEL	YES
DDX56	Behan FM (2019)	Colonic Cancer Cell Line	HT-29v1.1	COAD	-	cell proliferation	CRISPRn	Cas9	BAGEL	YES
DDX56	Behan FM (2019)	Colorectal Cancer Cell Line	HT55	COAD	-	cell proliferation	CRISPRn	Cas9	BAGEL	YES
DDX56	Behan FM (2019)	Pancreatic Adenocarcinoma Cell Line	HuP-T4	PAAD	-	cell proliferation	CRISPRn	Cas9	BAGEL	YES
DDX56	Behan FM (2019)	Ovarian Cancer Cell Line	IGROV-1	OV	-	cell proliferation	CRISPRn	Cas9	BAGEL	YES
DDX56	Behan FM (2019)	Gastric Adenocarcinoma Cell Line	IM-95	STAD	-	cell proliferation	CRISPRn	Cas9	BAGEL	YES
DDX56	Behan FM (2019)	Melanoma Cell Line	IST-MEL1	SKCM	-	cell proliferation	CRISPRn	Cas9	BAGEL	YES
DDX56	Behan FM (2019)	Ovary Adenocarcinoma Cell Line	JHOS-2 (RCB1521)	OV	-	cell proliferation	CRISPRn	Cas9	BAGEL	YES
DDX56	Behan FM (2019)	Ovary Adenocarcinoma Cell Line	JHOS-4 (RCB1678)	OV	-	cell proliferation	CRISPRn	Cas9	BAGEL	YES
DDX56	Behan FM (2019)	Head and Neck Squamous Cell Carcinoma Cell Line	JHU-011	HNSC	-	cell proliferation	CRISPRn	Cas9	BAGEL	YES
DDX56	Behan FM (2019)	Head and Neck Squamous Cell Carcinoma Cell Line	JHU-022	HNSC	-	cell proliferation	CRISPRn	Cas9	BAGEL	YES
DDX56	Behan FM (2019)	Head and Neck Squamous Cell Carcinoma Cell Line	JHU-029	HNSC	-	cell proliferation	CRISPRn	Cas9	BAGEL	YES
DDX56	Behan FM (2019)	Mammary Gland Tumor Cell Line	JIMT-1	BRCA	-	cell proliferation	CRISPRn	Cas9	BAGEL	YES
DDX56	Behan FM (2019)	Endometrial Cancer Cell Line	KLE	UCEC	-	cell proliferation	CRISPRn	Cas9	BAGEL	YES
DDX56	Behan FM (2019)	Colonic Cancer Cell Line	KM-12	COAD	-	cell proliferation	CRISPRn	Cas9	BAGEL	YES
DDX56	Behan FM (2019)	Glioblastoma Cell Line	KNS-42	GBMLGG	-	cell proliferation	CRISPRn	Cas9	BAGEL	YES
DDX56	Behan FM (2019)	Lung Cancer Cell Line	KNS-62	LUAD	-	cell proliferation	CRISPRn	Cas9	BAGEL	YES
DDX56	Behan FM (2019)	Pancreatic Cancer Cell Line	KP-1N	PAAD	-	cell proliferation	CRISPRn	Cas9	BAGEL	YES
DDX56	Behan FM (2019)	Pancreatic Cancer Cell Line	KP-3	PAAD	-	cell proliferation	CRISPRn	Cas9	BAGEL	YES
DDX56	Behan FM (2019)	Ovarian Cancer Cell Line	KURAMOCHI	OV	-	cell proliferation	CRISPRn	Cas9	BAGEL	YES
DDX56	Behan FM (2019)	Esophageal Cancer Cell Line	KYAE-1	ESCA	-	cell proliferation	CRISPRn	Cas9	BAGEL	YES
DDX56	Behan FM (2019)	Esophageal Squamous Cell Carcinoma Cell Line	KYSE-150	ESCA	-	cell proliferation	CRISPRn	Cas9	BAGEL	YES
DDX56	Behan FM (2019)	Esophageal Squamous Cell Carcinoma Cell Line	KYSE-220	ESCA	-	cell proliferation	CRISPRn	Cas9	BAGEL	YES
DDX56	Behan FM (2019)	Esophageal Squamous Cell Carcinoma Cell Line	KYSE-410	ESCA	-	cell proliferation	CRISPRn	Cas9	BAGEL	YES
DDX56	Behan FM (2019)	Renal Cell Carcinoma Cell Line	LB1047-RCC	KIRC	-	cell proliferation	CRISPRn	Cas9	BAGEL	YES
DDX56	Behan FM (2019)	Head and Neck Squamous Cell Carcinoma Cell Line	LB771-HNC	HNSC	-	cell proliferation	CRISPRn	Cas9	BAGEL	YES
DDX56	Behan FM (2019)	Lung Squamous Cell Carcinoma Cell Line	LC-1-sq	LUSC	-	cell proliferation	CRISPRn	Cas9	BAGEL	YES
DDX56	Behan FM (2019)	Lung Cancer Cell Line	LCLC-97TM1	LUAD	-	cell proliferation	CRISPRn	Cas9	BAGEL	YES
DDX56	Behan FM (2019)	Lung Squamous Cell Carcinoma Cell Line	LK-2	LUSC	-	cell proliferation	CRISPRn	Cas9	BAGEL	YES
DDX56	Behan FM (2019)	Glioblastoma Cell Line	LN-229	GBMLGG	-	cell proliferation	CRISPRn	Cas9	BAGEL	YES
DDX56	Behan FM (2019)	Prostate Cancer Cell Line	LNCaP-Clone-FGC	PRAD	-	cell proliferation	CRISPRn	Cas9	BAGEL	YES
DDX56	Behan FM (2019)	Lung Cancer Cell Line	LOU-NH91	LUAD	-	cell proliferation	CRISPRn	Cas9	BAGEL	YES
DDX56	Behan FM (2019)	Colonic Adenocarcinoma Cell Line	LoVo	COAD	-	cell proliferation	CRISPRn	Cas9	BAGEL	YES
DDX56	Behan FM (2019)	Cecum Cancer Cell Line	LS-1034	COAD	-	cell proliferation	CRISPRn	Cas9	BAGEL	YES
DDX56	Behan FM (2019)	Colorectal Adenocarcinoma Cell Line	LS-180	COAD	-	cell proliferation	CRISPRn	Cas9	BAGEL	YES
DDX56	Behan FM (2019)	Cecum Cancer Cell Line	LS-411N	COAD	-	cell proliferation	CRISPRn	Cas9	BAGEL	YES
DDX56	Behan FM (2019)	Cecum Cancer Cell Line	LS513	COAD	-	cell proliferation	CRISPRn	Cas9	BAGEL	YES
DDX56	Behan FM (2019)	Lung Cancer Cell Line	LXF-289	LUAD	-	cell proliferation	CRISPRn	Cas9	BAGEL	YES
DDX56	Behan FM (2019)	Ovarian Cancer Cell Line	MCAS	OV	-	cell proliferation	CRISPRn	Cas9	BAGEL	YES
DDX56	Behan FM (2019)	Breast Adenocarcinoma Cell Line	MCF7	BRCA	-	cell proliferation	CRISPRn	Cas9	BAGEL	YES
DDX56	Behan FM (2019)	Breast Adenocarcinoma Cell Line	MDA-MB-231	BRCA	-	cell proliferation	CRISPRn	Cas9	BAGEL	YES
DDX56	Behan FM (2019)	Mammary Gland Tumor Cell Line	MDA-MB-361	BRCA	-	cell proliferation	CRISPRn	Cas9	BAGEL	YES
DDX56	Behan FM (2019)	Breast Cancer Cell Line	MDAMB415	BRCA	-	cell proliferation	CRISPRn	Cas9	BAGEL	YES
DDX56	Behan FM (2019)	Mammary Gland Tumor Cell Line	MDA-MB-436	BRCA	-	cell proliferation	CRISPRn	Cas9	BAGEL	YES
DDX56	Behan FM (2019)	Mammary Gland Tumor Cell Line	MDA-MB-453	BRCA	-	cell proliferation	CRISPRn	Cas9	BAGEL	YES
DDX56	Behan FM (2019)	Mammary Gland Tumor Cell Line	MDA-MB-468	BRCA	-	cell proliferation	CRISPRn	Cas9	BAGEL	YES
DDX56	Behan FM (2019)	Colonic Cancer Cell Line	MDST8	COAD	-	cell proliferation	CRISPRn	Cas9	BAGEL	YES
DDX56	Behan FM (2019)	Endometrial Cancer Cell Line	MFE-280	UCEC	-	cell proliferation	CRISPRn	Cas9	BAGEL	YES
DDX56	Behan FM (2019)	Endometrial Cancer Cell Line	MFE-296	UCEC	-	cell proliferation	CRISPRn	Cas9	BAGEL	YES
DDX56	Behan FM (2019)	Mammary Gland Tumor Cell Line	MFM-223	BRCA	-	cell proliferation	CRISPRn	Cas9	BAGEL	YES
DDX56	Behan FM (2019)	Non-Small Cell Lung Cancer Cell Line	NCI-H1155	LUAD	-	cell proliferation	CRISPRn	Cas9	BAGEL	YES
DDX56	Behan FM (2019)	Non-Small Cell Lung Cancer Cell Line	NCI-H1299	LUAD	-	cell proliferation	CRISPRn	Cas9	BAGEL	YES
DDX56	Behan FM (2019)	Lung Adenocarcinoma Cell Line	NCI-H1355	LUAD	-	cell proliferation	CRISPRn	Cas9	BAGEL	YES
DDX56	Behan FM (2019)	Non-Small Cell Lung Cancer Cell Line	NCI-H1581	LUAD	-	cell proliferation	CRISPRn	Cas9	BAGEL	YES
DDX56	Behan FM (2019)	Lung Adenocarcinoma Cell Line	NCI-H1650	LUAD	-	cell proliferation	CRISPRn	Cas9	BAGEL	YES
DDX56	Behan FM (2019)	Lung Adenocarcinoma Cell Line	NCI-H1755	LUAD	-	cell proliferation	CRISPRn	Cas9	BAGEL	YES
DDX56	Behan FM (2019)	Lung Cancer Cell Line	NCI-H1869	LUAD	-	cell proliferation	CRISPRn	Cas9	BAGEL	YES
DDX56	Behan FM (2019)	Non-Small Cell Lung Cancer Cell Line	NCI-H1915	LUAD	-	cell proliferation	CRISPRn	Cas9	BAGEL	YES
DDX56	Behan FM (2019)	Lung Cancer Cell Line	NCI-H1944	LUAD	-	cell proliferation	CRISPRn	Cas9	BAGEL	YES
DDX56	Behan FM (2019)	Non-Small Cell Lung Cancer Cell Line	NCI-H1975	LUAD	-	cell proliferation	CRISPRn	Cas9	BAGEL	YES
DDX56	Behan FM (2019)	Lung Cancer Cell Line	NCI-H1993	LUAD	-	cell proliferation	CRISPRn	Cas9	BAGEL	YES
DDX56	Behan FM (2019)	Lung Cancer Cell Line	NCI-H2023	LUAD	-	cell proliferation	CRISPRn	Cas9	BAGEL	YES
DDX56	Behan FM (2019)	Lung Adenocarcinoma Cell Line	NCI-H2087	LUAD	-	cell proliferation	CRISPRn	Cas9	BAGEL	YES
DDX56	Behan FM (2019)	Lung Squamous Cell Carcinoma Cell Line	NCI-H2170	LUSC	-	cell proliferation	CRISPRn	Cas9	BAGEL	YES
DDX56	Behan FM (2019)	Non-Small Cell Lung Cancer Cell Line	NCI-H226	LUAD	-	cell proliferation	CRISPRn	Cas9	BAGEL	YES
DDX56	Behan FM (2019)	Lung Adenocarcinoma Cell Line	NCI-H23	LUAD	-	cell proliferation	CRISPRn	Cas9	BAGEL	YES
DDX56	Behan FM (2019)	Lung Adenocarcinoma Cell Line	NCI-H3122	LUAD	-	cell proliferation	CRISPRn	Cas9	BAGEL	YES
DDX56	Behan FM (2019)	Non-Small Cell Lung Cancer Cell Line	NCI-H322M	LUAD	-	cell proliferation	CRISPRn	Cas9	BAGEL	YES
DDX56	Behan FM (2019)	Non-Small Cell Lung Cancer Cell Line	NCI-H358	LUAD	-	cell proliferation	CRISPRn	Cas9	BAGEL	YES
DDX56	Behan FM (2019)	Non-Small Cell Lung Cancer Cell Line	NCI-H520	LUAD	-	cell proliferation	CRISPRn	Cas9	BAGEL	YES
DDX56	Behan FM (2019)	Lung Cancer Cell Line	NCI-H650	LUAD	-	cell proliferation	CRISPRn	Cas9	BAGEL	YES
DDX56	Behan FM (2019)	Gastric Cancer Cell Line	NCI-N87	STAD	-	cell proliferation	CRISPRn	Cas9	BAGEL	YES
DDX56	Behan FM (2019)	Glioblastoma Cell Line	no-10	GBMLGG	-	cell proliferation	CRISPRn	Cas9	BAGEL	YES
DDX56	Behan FM (2019)	Glioblastoma Cell Line	no-11	GBMLGG	-	cell proliferation	CRISPRn	Cas9	BAGEL	YES
DDX56	Behan FM (2019)	Gastric Adenocarcinoma Cell Line	NUGC-3	STAD	-	cell proliferation	CRISPRn	Cas9	BAGEL	YES
DDX56	Behan FM (2019)	Ovarian Cancer Cell Line	OAW-42	OV	-	cell proliferation	CRISPRn	Cas9	BAGEL	YES
DDX56	Behan FM (2019)	Ovarian Cancer Cell Line	OC-314	OV	-	cell proliferation	CRISPRn	Cas9	BAGEL	YES
DDX56	Behan FM (2019)	Breast Cancer Cell Line	OCUB-M	BRCA	-	cell proliferation	CRISPRn	Cas9	BAGEL	YES
DDX56	Behan FM (2019)	Esophageal Cancer Cell Line	OE-21	ESCA	-	cell proliferation	CRISPRn	Cas9	BAGEL	YES
DDX56	Behan FM (2019)	Esophageal Cancer Cell Line	OE-33	ESCA	-	cell proliferation	CRISPRn	Cas9	BAGEL	YES
DDX56	Behan FM (2019)	Ovary Adenocarcinoma Cell Line	OV-90	OV	-	cell proliferation	CRISPRn	Cas9	BAGEL	YES
DDX56	Behan FM (2019)	Ovarian Cancer Cell Line	OVCA420	OV	-	cell proliferation	CRISPRn	Cas9	BAGEL	YES
DDX56	Behan FM (2019)	Ovary Adenocarcinoma Cell Line	OVCAR-3	OV	-	cell proliferation	CRISPRn	Cas9	BAGEL	YES
DDX56	Behan FM (2019)	Ovarian Cancer Cell Line	OVCAR-5	OV	-	cell proliferation	CRISPRn	Cas9	BAGEL	YES
DDX56	Behan FM (2019)	Ovary Adenocarcinoma Cell Line	OVISE	OV	-	cell proliferation	CRISPRn	Cas9	BAGEL	YES
DDX56	Behan FM (2019)	Ovarian Cancer Cell Line	OVK-18 (RCB1903)	OV	-	cell proliferation	CRISPRn	Cas9	BAGEL	YES
DDX56	Behan FM (2019)	Ovarian Cancer Cell Line	OVMIU	OV	-	cell proliferation	CRISPRn	Cas9	BAGEL	YES
DDX56	Behan FM (2019)	Pancreatic Adenocarcinoma Cell Line	PA-TU-8988T	PAAD	-	cell proliferation	CRISPRn	Cas9	BAGEL	YES
DDX56	Behan FM (2019)	Pancreatic Ductal Adenocarcinoma Cell Line	Panc 10.05	PAAD	-	cell proliferation	CRISPRn	Cas9	BAGEL	YES
DDX56	Behan FM (2019)	Lung Adenocarcinoma Cell Line	PC-14	LUAD	-	cell proliferation	CRISPRn	Cas9	BAGEL	YES
DDX56	Behan FM (2019)	Ovarian Cancer Cell Line	PEO1	OV	-	cell proliferation	CRISPRn	Cas9	BAGEL	YES
DDX56	Behan FM (2019)	Ovarian Cancer Cell Line	PEO4	OV	-	cell proliferation	CRISPRn	Cas9	BAGEL	YES
DDX56	Behan FM (2019)	Pancreatic Ductal Adenocarcinoma Cell Line	PL4	PAAD	-	cell proliferation	CRISPRn	Cas9	BAGEL	YES
DDX56	Behan FM (2019)	Pancreatic Adenocarcinoma Cell Line	PSN-1	PAAD	-	cell proliferation	CRISPRn	Cas9	BAGEL	YES
DDX56	Behan FM (2019)	Renal Cell Carcinoma Cell Line	RCC-FG2	KIRC	-	cell proliferation	CRISPRn	Cas9	BAGEL	YES
DDX56	Behan FM (2019)	Colonic Cancer Cell Line	RCM-1	COAD	-	cell proliferation	CRISPRn	Cas9	BAGEL	YES
DDX56	Behan FM (2019)	Lung Squamous Cell Carcinoma Cell Line	RERF-LC-Sq1	LUSC	-	cell proliferation	CRISPRn	Cas9	BAGEL	YES
DDX56	Behan FM (2019)	Colonic Cancer Cell Line	RKO	COAD	-	cell proliferation	CRISPRn	Cas9	BAGEL	YES
DDX56	Behan FM (2019)	Endometrial Cancer Cell Line	RL95-2	UCEC	-	cell proliferation	CRISPRn	Cas9	BAGEL	YES
DDX56	Behan FM (2019)	Ovary Adenocarcinoma Cell Line	RMG-I	OV	-	cell proliferation	CRISPRn	Cas9	BAGEL	YES
DDX56	Behan FM (2019)	Glioblastoma Cell Line	SF-295	GBMLGG	-	cell proliferation	CRISPRn	Cas9	BAGEL	YES
DDX56	Behan FM (2019)	Esophageal Cancer Cell Line	SK-GT-4	ESCA	-	cell proliferation	CRISPRn	Cas9	BAGEL	YES
DDX56	Behan FM (2019)	Melanoma Cell Line	SK-MEL-2	SKCM	-	cell proliferation	CRISPRn	Cas9	BAGEL	YES
DDX56	Behan FM (2019)	Lung Squamous Cell Carcinoma Cell Line	SK-MES-1	LUSC	-	cell proliferation	CRISPRn	Cas9	BAGEL	YES
DDX56	Behan FM (2019)	Head and Neck Squamous Cell Carcinoma Cell Line	SKN-3	HNSC	-	cell proliferation	CRISPRn	Cas9	BAGEL	YES
DDX56	Behan FM (2019)	Glioblastoma Cell Line	SNB75	GBMLGG	-	cell proliferation	CRISPRn	Cas9	BAGEL	YES
DDX56	Behan FM (2019)	Endometrial Cancer Cell Line	SNG-M	UCEC	-	cell proliferation	CRISPRn	Cas9	BAGEL	YES
DDX56	Behan FM (2019)	Gastric Cancer Cell Line	SNU-1	STAD	-	cell proliferation	CRISPRn	Cas9	BAGEL	YES
DDX56	Behan FM (2019)	Gastric Cancer Cell Line	SNU-16	STAD	-	cell proliferation	CRISPRn	Cas9	BAGEL	YES
DDX56	Behan FM (2019)	Colonic Cancer Cell Line	SNU-C1	COAD	-	cell proliferation	CRISPRn	Cas9	BAGEL	YES
DDX56	Behan FM (2019)	Cecum Cancer Cell Line	SNU-C5	COAD	-	cell proliferation	CRISPRn	Cas9	BAGEL	YES
DDX56	Behan FM (2019)	Pancreatic Ductal Adenocarcinoma Cell Line	SU.86.86	PAAD	-	cell proliferation	CRISPRn	Cas9	BAGEL	YES
DDX56	Behan FM (2019)	Pancreatic Cancer Cell Line	SUIT-2	PAAD	-	cell proliferation	CRISPRn	Cas9	BAGEL	YES
DDX56	Behan FM (2019)	Lung Cancer Cell Line	SW1573	LUAD	-	cell proliferation	CRISPRn	Cas9	BAGEL	YES
DDX56	Behan FM (2019)	Colorectal Adenocarcinoma Cell Line	SW-48	COAD	-	cell proliferation	CRISPRn	Cas9	BAGEL	YES
DDX56	Behan FM (2019)	Colonic Cancer Cell Line	SW-620	COAD	-	cell proliferation	CRISPRn	Cas9	BAGEL	YES
DDX56	Behan FM (2019)	Colonic Adenocarcinoma Cell Line	SW626	COAD	-	cell proliferation	CRISPRn	Cas9	BAGEL	YES
DDX56	Behan FM (2019)	Colonic Cancer Cell Line	SW837	COAD	-	cell proliferation	CRISPRn	Cas9	BAGEL	YES
DDX56	Behan FM (2019)	Esophageal Squamous Cell Carcinoma Cell Line	T-T	ESCA	-	cell proliferation	CRISPRn	Cas9	BAGEL	YES
DDX56	Behan FM (2019)	Breast Cancer Cell Line	T-47D	BRCA	-	cell proliferation	CRISPRn	Cas9	BAGEL	YES
DDX56	Behan FM (2019)	Colonic Cancer Cell Line	T-84	COAD	-	cell proliferation	CRISPRn	Cas9	BAGEL	YES
DDX56	Behan FM (2019)	Glioblastoma Cell Line	T-98G	GBMLGG	-	cell proliferation	CRISPRn	Cas9	BAGEL	YES
DDX56	Behan FM (2019)	Esophageal Squamous Cell Carcinoma Cell Line	TE-10	ESCA	-	cell proliferation	CRISPRn	Cas9	BAGEL	YES
DDX56	Behan FM (2019)	Esophageal Squamous Cell Carcinoma Cell Line	TE-4	ESCA	-	cell proliferation	CRISPRn	Cas9	BAGEL	YES
DDX56	Behan FM (2019)	Esophageal Squamous Cell Carcinoma Cell Line	TE-5 (RCB1949)	ESCA	-	cell proliferation	CRISPRn	Cas9	BAGEL	YES
DDX56	Behan FM (2019)	Esophageal Squamous Cell Carcinoma Cell Line	TE-8	ESCA	-	cell proliferation	CRISPRn	Cas9	BAGEL	YES
DDX56	Behan FM (2019)	Esophageal Squamous Cell Carcinoma Cell Line	TE-9	ESCA	-	cell proliferation	CRISPRn	Cas9	BAGEL	YES
DDX56	Behan FM (2019)	Gastric Cancer Cell Line	TMK-1	STAD	-	cell proliferation	CRISPRn	Cas9	BAGEL	YES
DDX56	Behan FM (2019)	Ovarian Cancer Cell Line	TOV-112D	OV	-	cell proliferation	CRISPRn	Cas9	BAGEL	YES
DDX56	Behan FM (2019)	Ovarian Cancer Cell Line	TOV-21G	OV	-	cell proliferation	CRISPRn	Cas9	BAGEL	YES
DDX56	Behan FM (2019)	Ovarian Cancer Cell Line	TYK-nu	OV	-	cell proliferation	CRISPRn	Cas9	BAGEL	YES
DDX56	Behan FM (2019)	Glioblastoma Cell Line	U-87MG	GBMLGG	-	cell proliferation	CRISPRn	Cas9	BAGEL	YES
DDX56	Behan FM (2019)	Glioma Cell Line	U-251 MG	GBMLGG	-	cell proliferation	CRISPRn	Cas9	BAGEL	YES
DDX56	Behan FM (2019)	Mammary Gland Tumor Cell Line	UACC-893	BRCA	-	cell proliferation	CRISPRn	Cas9	BAGEL	YES
DDX56	Behan FM (2019)	Ovarian Cancer Cell Line	UWB1.289	OV	-	cell proliferation	CRISPRn	Cas9	BAGEL	YES
DDX56	Behan FM (2019)	Lung Cancer Cell Line	VMRC-LCD	LUAD	-	cell proliferation	CRISPRn	Cas9	BAGEL	YES
DDX56	Behan FM (2019)	Glioblastoma Cell Line	YH-13	GBMLGG	-	cell proliferation	CRISPRn	Cas9	BAGEL	YES
DDX56	MacLeod G (2019)	Glioblastoma Cell Line	G549NS (patient-derived)	GBMLGG	-	cell proliferation	CRISPRn	Cas9	BAGEL	YES
DDX56	MacLeod G (2019)	Glioblastoma Cell Line	G523NS (patient-derived)	GBMLGG	-	cell proliferation	CRISPRn	Cas9	BAGEL	YES
DDX56	MacLeod G (2019)	Glioblastoma Cell Line	G477NS (patient-derived)	GBMLGG	-	cell proliferation	CRISPRn	Cas9	BAGEL	YES
DDX56	MacLeod G (2019)	Glioblastoma Cell Line	G432NS (patient-derived)	GBMLGG	-	cell proliferation	CRISPRn	Cas9	BAGEL	YES
DDX56	MacLeod G (2019)	Glioblastoma Cell Line	G440NS (patient-derived)	GBMLGG	-	cell proliferation	CRISPRn	Cas9	BAGEL	YES
DDX56	MacLeod G (2019)	Glioblastoma Cell Line	G472NS (patient-derived)	GBMLGG	-	cell proliferation	CRISPRn	Cas9	BAGEL	YES
DDX56	MacLeod G (2019)	Glioblastoma Cell Line	G510NS (patient-derived)	GBMLGG	-	cell proliferation	CRISPRn	Cas9	BAGEL	YES
DDX56	MacLeod G (2019)	Glioblastoma Cell Line	G361NS (patient-derived)	GBMLGG	-	cell proliferation	CRISPRn	Cas9	BAGEL	YES
DDX56	Martin TD (2017)	Colorectal Cancer Cell Line	HCT-116	COAD	-	cell proliferation	CRISPRn	Cas9	EdgeR	YES
DDX56	Fei T (2019)	Breast Cancer Cell Line	T-47D	BRCA	-	cell proliferation	CRISPRn	Cas9	MaGeCK	YES
DDX56	Fei T (2019)	Prostate Cancer Cell Line	LNCaP	PRAD	-	cell proliferation	CRISPRn	Cas9	MaGeCK	YES
DDX56	Liang J (2020)	Hepatoma Cell Line	PLC-PRF-5	LIHC	-	cell proliferation	CRISPRn	Cas9	MaGeCK	YES
