# Supplementary material for: Pan-cancer analysis identifies DDX56 as a prognostic biomarker associated with immune infiltration and drug sensitivity
Source: Front Genet. 2022 Dec 7;13:1004467. doi: 10.3389/fgene.2022.1004467 (PMC9768347; doi:10.3389/fgene.2022.1004467)
Supplement: Supplementary file 2 [file Table3.XLSX]

## Sheet: Sheet1
Gene	Author (Year)	Cell Type	Cell Line	tumor	Phenotype	Condition (Dosage)	Library	Enzyme	Analysis	Pvalue	HIT
DDX56	MacLeod G (2019)	Glioblastoma Cell Line	G510NS (patient-derived)	GBM	response to chemicals	Temozolomide (20.0 LD (%Lethal Dose))	CRISPRn	Cas9	Delta Z scores	P value not provided	YES
DDX56	Awah CU (2020)	Glioblastoma Cell Line	SNB-19	GBM	response to chemicals	Etoposide (5.0 µM)	CRISPRn	Cas9	sgRSEA	0.00324875	YES
DDX56	Nechiporuk T (2019)	Acute Myeloid Leukemia Cell Line	MOLM-13	AML	response to chemicals	Venetoclax (1.0 μmol/L)	CRISPRn	Cas9	MaGeCK	0.048388	YES
DDX56	Schleicher EM (2020)	Mammary Epithelial Cell Line	MCF-10A	BRCA	response to chemicals	Berzosertib (VE822) (1.5 µM)	CRISPRa	SAM	RSA	0.00701455	YES
DDX56	Gobbi G (2019)	Non-Small Cell Lung Adenocarcinoma Cell Line	A549	LUAD	response to chemicals	JQ1 (1.0 µM)	CRISPRn	Cas9	MAGeCK-MLE	1.2728e-14	YES
DDX56	Ramaker RC (2021)	Pancreatic Cancer Cell Line	PANC-1	PAAC	response to chemicals	Oxaliplatin (2.5 µM)	CRISPRn	Cas9	Log2 Fold Change (L2FC)	0.00346688	YES
