# Supplementary material for: Pan-cancer analysis identifies DDX56 as a prognostic biomarker associated with immune infiltration and drug sensitivity
Source: Front Genet. 2022 Dec 7;13:1004467. doi: 10.3389/fgene.2022.1004467 (PMC9768347; doi:10.3389/fgene.2022.1004467)
Supplement: Supplementary file 7 [file Table1.XLSX]

## Sheet: Sheet1
Cancer type	Abbreviation	Expression analysis (RNA)	Expression analysis (Protein)	Single cell RNA-seq analysis（TISCH）	Survival (Univariable analysis)	Survival (Multivariate analysis)	Clinical correlation	Co-expression analysis and GSEA	Profiling tumor infiltrating immune cells	Mutation	Correlation of CNV and RNA expression of DDX56	Methylation Analysis of DDX56
Adrenocortical carcinoma	ACC	No	No	No	Yes	Yes	Yes	Yes	Yes	Yes	No	No
Bladder Urothelial Carcinoma	BLCA	Yes	No	No	Yes	Yes	Yes	Yes	Yes	Yes	Yes	Yes
Breast invasive carcinoma	BRCA	Yes	Yes	Yes	Yes	Yes	Yes	Yes	Yes	Yes	Yes	Yes
Cervical squamous cell carcinoma and endocervical adenocarcinoma	CESC	Yes	No	No	Yes	Yes	No	Yes	Yes	Yes	Yes	Yes
Cholangiocarcinoma	CHOL	Yes	No	No	Yes	Yes	Yes	Yes	Yes	No	Yes	Yes
Colon adenocarcinoma	COAD	Yes	Yes	Yes	Yes	Yes	Yes	Yes	Yes	Yes	Yes	Yes
Esophageal carcinoma	ESCA	Yes	No	No	Yes	Yes	Yes	Yes	Yes	Yes	Yes	Yes
Glioblastoma multiforme	GBM	No	Yes	Yes	Yes	Yes	No	Yes	Yes	Yes	Yes	No
Head and Neck squamous cell carcinoma	HNSC	Yes	Yes	Yes	Yes	Yes	Yes	Yes	Yes	Yes	Yes	No
Kidney Chromophobe	KICH	Yes	No	No	Yes	Yes	Yes	Yes	Yes	No	Yes	No
Kidney renal clear cell carcinoma	KIRC	Yes	Yes	No	Yes	Yes	Yes	Yes	Yes	No	Yes	Yes
Kidney renal papillary cell carcinoma	KIRP	Yes	No	No	Yes	Yes	Yes	Yes	Yes	Yes	Yes	Yes
Brain Lower Grade Glioma	LGG	No	No	No	Yes	Yes	No	Yes	Yes	Yes	No	No
Liver hepatocellular carcinoma	LIHC	Yes	Yes	No	Yes	Yes	Yes	Yes	Yes	Yes	Yes	Yes
Lung adenocarcinoma	LUAD	Yes	Yes	Yes	Yes	Yes	Yes	Yes	Yes	Yes	Yes	Yes
Lung squamous cell carcinoma	LUSC	Yes	No	No	Yes	Yes	Yes	Yes	Yes	Yes	Yes	Yes
Mesothelioma	MESO	No	No	No	Yes	Yes	Yes	Yes	Yes	No	Yes	No
Ovarian serous cystadenocarcinoma	OV	No	Yes	Yes	Yes	Yes	No	Yes	Yes	Yes	No	No
Pancreatic adenocarcinoma	PAAD	Yes	Yes	Yes	Yes	Yes	Yes	Yes	Yes	Yes	Yes	Yes
Pheochromocytoma and Paraganglioma	PCPG	Yes	No	No	Yes	Yes	No	Yes	Yes	Yes	Yes	Yes
Prostate adenocarcinoma	PRAD	Yes	No	No	Yes	Yes	No	Yes	Yes	Yes	Yes	Yes
Rectum adenocarcinoma	READ	Yes	No	No	Yes	Yes	Yes	Yes	Yes	No	Yes	No
Sarcoma	SARC	Yes	No	No	Yes	Yes	No	Yes	Yes	Yes	Yes	No
Skin Cutaneous Melanoma	SKCM	Yes	No	Yes	Yes	Yes	Yes	Yes	Yes	Yes	Yes	No
Stomach adenocarcinoma	STAD	Yes	No	Yes	Yes	Yes	Yes	Yes	Yes	Yes	Yes	No
Testicular Germ Cell Tumors	TGCT	No	No	No	Yes	Yes	Yes	Yes	Yes	Yes	Yes	No
Thyroid carcinoma	THCA	Yes	No	No	Yes	Yes	Yes	Yes	Yes	No	Yes	No
Thymoma	THYM	Yes	No	No	Yes	Yes	No	Yes	Yes	No	Yes	No
Uterine Corpus Endometrial Carcinoma	UCEC	Yes	Yes	No	Yes	Yes	No	Yes	Yes	Yes	Yes	No
Uterine Carcinosarcoma	UCS	No	No	No	Yes	Yes	No	Yes	Yes	Yes	Yes	No
Uveal Melanoma	UVM	No	No	Yes	Yes	Yes	Yes	Yes	Yes	No	Yes	No
Neuroendocrine tumor	NET	No	No	Yes	No	No	No	No	No	No	No	No
Basal cell carcinoma	BCC	No	No	Yes	No	No	No	No	No	No	No	No
