# Supplementary material for: Pan-cancer analysis identifies DDX56 as a prognostic biomarker associated with immune infiltration and drug sensitivity
Source: Front Genet. 2022 Dec 7;13:1004467. doi: 10.3389/fgene.2022.1004467 (PMC9768347; doi:10.3389/fgene.2022.1004467)
Supplement: Supplementary file 9 [file Table5.XLSX]

## Sheet: Sheet1
Cancer type	Abbreviation	Expression analysis (RNA)	Expression analysis (Protein)	Single cell RNA-seq analysis（TISCH）	Survival (Univariable analysis)	Survival (Multivariate analysis)	Co-expression analysis and GSEA (Promote cell proliferation)	Have CRSPR Screens evidence (Promote cell proliferation)	Co-expression analysis and GSEA (Unfold protein response)	Profiling tumor infiltrating immune cells	Mutation	Correlation of CNV and RNA expression of DDX56	Methylation Analysis of DDX56 (Tumor tissue vs Normal tissue)
Adrenocortical carcinoma	ACC	-	-	-	High expression of DDX56 leads to worse prognosis	High expression of DDX56 leads to worse prognosis	Yes	Yes	No	Yes	Yes	-	-
Bladder Urothelial Carcinoma	BLCA	High expressed in tumor tissue	-	-	High expression of DDX56 leads to worse prognosis(Not significant)	Not enough data/Not significant	Yes	Yes	Yes	Yes	Yes	Yes	Not significant
Breast invasive carcinoma	BRCA	High expressed in tumor tissue	High expressed in tumor tissue	High expressed in malignant cells	High expression of DDX56 leads to worse prognosis(Not significant)	Not enough data/Not significant	Yes	Yes	Yes	Yes	Yes	Yes	Hypermethylation in tumor tissue
Cervical squamous cell carcinoma and endocervical adenocarcinoma	CESC	High expressed in tumor tissue	-	-	High expression of DDX56 leads to better prognosis(Not significant)	Not enough data/Not significant	Yes	Yes	No	Yes	Yes	Yes	Hypermethylation in tumor tissue
Cholangiocarcinoma	CHOL	High expressed in tumor tissue	-	-	High expression of DDX56 leads to better prognosis(Not significant)	Not enough data/Not significant	Yes	Yes	Yes	Yes	-	Yes	Not significant
Colon adenocarcinoma	COAD	High expressed in tumor tissue	High expressed in tumor tissue	High expressed in malignant cells	High expression of DDX56 leads to worse prognosis	Not enough data/Not significant	Yes	Yes	Yes	Yes	Yes	Yes	Not significant
Esophageal carcinoma	ESCA	High expressed in tumor tissue	-	-	High expression of DDX56 leads to worse prognosis(Not significant)	Not enough data/Not significant	Yes	Yes	Yes	Yes	Yes	Yes	Hypermethylation in tumor tissue
Glioblastoma multiforme	GBM	-	High expressed in tumor tissue	High expressed in malignant cells	High expression of DDX56 leads to worse prognosis	Not enough data/Not significant	Yes	Yes	Yes	Yes	Yes	Yes	-
Head and Neck squamous cell carcinoma	HNSC	High expressed in tumor tissue	High expressed in tumor tissue	High expressed in malignant cells	High expression of DDX56 leads to worse prognosis	High expression of DDX56 leads to worse prognosis	Yes	Yes	Yes	Yes	Yes	Yes	-
Kidney Chromophobe	KICH	High expressed in normal tissue	-	-	High expression of DDX56 leads to worse prognosis	High expression of DDX56 leads to worse prognosis	Yes	Yes	Yes	Yes	-	Yes	-
Kidney renal clear cell carcinoma	KIRC	High expressed in tumor tissue	High expressed in tumor tissue	-	High expression of DDX56 leads to worse prognosis	Not enough data/Not significant	Yes	Yes	No	Yes	-	Yes	Hypomethylation in tumor tissue
Kidney renal papillary cell carcinoma	KIRP	High expressed in tumor tissue	-	-	High expression of DDX56 leads to better prognosis(Not significant)	Not enough data/Not significant	Yes	Yes	No	Yes	Yes	Yes	Hypermethylation in tumor tissue
Brain Lower Grade Glioma	LGG	-	-	-	High expression of DDX56 leads to worse prognosis	Not enough data/Not significant	Yes	Yes	Yes	Yes	Yes	-	-
Liver hepatocellular carcinoma	LIHC	High expressed in tumor tissue	High expressed in tumor tissue	-	High expression of DDX56 leads to worse prognosis	High expression of DDX56 leads to worse prognosis	Yes	Yes	Yes	Yes	Yes	Yes	Hypomethylation in tumor tissue
Lung adenocarcinoma	LUAD	High expressed in tumor tissue	High expressed in tumor tissue	High expressed in malignant cells	High expression of DDX56 leads to worse prognosis	Not enough data/Not significant	Yes	Yes	Yes	Yes	Yes	Yes	Not significant
Lung squamous cell carcinoma	LUSC	High expressed in tumor tissue	-	-	High expression of DDX56 leads to better prognosis	High expression of DDX56 leads to better prognosis	Yes	Yes	Yes	Yes	Yes	Yes	Hypermethylation in tumor tissue
Mesothelioma	MESO	-	-	-	High expression of DDX56 leads to worse prognosis(Not significant)	Not enough data/Not significant	Yes	Yes	Yes	Yes	-	Yes	-
Ovarian serous cystadenocarcinoma	OV	-	High expressed in normal tissue (Not significant)	High expressed in malignant cells	High expression of DDX56 leads to better prognosis	Not enough data/Not significant	Yes	Yes	No	Yes	Yes	-	-
Pancreatic adenocarcinoma	PAAD	High expressed in tumor tissue (Not significant)	High expressed in tumor tissue	High expressed in malignant cells	High expression of DDX56 leads to better prognosis	Not enough data/Not significant	Yes	Yes	Yes	Yes	Yes	Yes	Hypomethylation in tumor tissue
Pheochromocytoma and Paraganglioma	PCPG	High expressed in normal tissue (Not significant)	-	-	High expression of DDX56 leads to better prognosis(Not significant)	Not enough data/Not significant	No	No	No	Yes	Yes	Yes	Hypomethylation in tumor tissue
Prostate adenocarcinoma	PRAD	High expressed in tumor tissue	-	-	High expression of DDX56 leads to worse prognosis(Not significant)	Not enough data/Not significant	Yes	Yes	No	Yes	Yes	Yes	Hypomethylation in tumor tissue
Rectum adenocarcinoma	READ	High expressed in tumor tissue	-	-	High expression of DDX56 leads to worse prognosis(Not significant)	Not enough data/Not significant	Yes	Yes	No	Yes	-	Yes	-
Sarcoma	SARC	High expressed in tumor tissue (Not significant)	-	-	High expression of DDX56 leads to worse prognosis(Not significant)	Not enough data/Not significant	Yes	Yes	Yes	Yes	Yes	Yes	-
Skin Cutaneous Melanoma	SKCM	High expressed in tumor tissue (Not significant)	-	High expressed in malignant cells	High expression of DDX56 leads to better prognosis(Not significant)	Not enough data/Not significant	Yes	Yes	No	Yes	Yes	Yes	-
Stomach adenocarcinoma	STAD	High expressed in tumor tissue	-	High expressed in malignant cells	High expression of DDX56 leads to worse prognosis(Not significant)	Not enough data/Not significant	Yes	Yes	Yes	Yes	Yes	Yes	-
Testicular Germ Cell Tumors	TGCT	-	-	-	High expression of DDX56 leads to better prognosis(Not significant)	Not enough data/Not significant	Yes	Yes	No	Yes	Yes	Yes	-
Thyroid carcinoma	THCA	High expressed in normal tissue (Not significant)	-	-	High expression of DDX56 leads to worse prognosis	High expression of DDX56 leads to worse prognosis	No	No	No	Yes	-	Yes	-
Thymoma	THYM	High expressed in tumor tissue (Not significant)	-	-	High expression of DDX56 leads to better prognosis(Not significant)	Not enough data/Not significant	Yes	Yes	No	Yes	-	Yes	-
Uterine Corpus Endometrial Carcinoma	UCEC	High expressed in tumor tissue	High expressed in tumor tissue	-	High expression of DDX56 leads to worse prognosis(Not significant)	Not enough data/Not significant	Yes	Yes	No	Yes	Yes	Yes	-
Uterine Carcinosarcoma	UCS	-	-	-	High expression of DDX56 leads to worse prognosis(Not significant)	Not enough data/Not significant	Yes	Yes	No	Yes	Yes	Yes	-
Uveal Melanoma	UVM	-	-	High expressed in malignant cells	High expression of DDX56 leads to worse prognosis	High expression of DDX56 leads to worse prognosis	Yes	Yes	Yes	Yes	-	Yes	-
Neuroendocrine tumor	NET	-	-	High expressed in malignant cells	-	-	-	-	-	No	-	-	-
Basal cell carcinoma	BCC	-	-	High expressed in malignant cells	-	-	-	-	-	No	-	-	-

## Sheet: Sheet4
Expression analysis (RNA)	Expression analysis (Protein)	Single cell RNA-seq analysis（TISCH）
-	-	-
High expressed in tumor tissue	-	-
High expressed in tumor tissue	High expressed in tumor tissue	High expressed in malignant cells
High expressed in tumor tissue	-	-
High expressed in tumor tissue	-	-
High expressed in tumor tissue	High expressed in tumor tissue	High expressed in malignant cells
High expressed in tumor tissue	-	-
-	High expressed in tumor tissue	High expressed in malignant cells
High expressed in tumor tissue	High expressed in tumor tissue	High expressed in malignant cells
High expressed in -rmal tissue	-	-
High expressed in tumor tissue	High expressed in tumor tissue	-
High expressed in tumor tissue	-	-
-	-	-
High expressed in tumor tissue	High expressed in tumor tissue	-
High expressed in tumor tissue	High expressed in tumor tissue	High expressed in malignant cells
High expressed in tumor tissue	-	-
-	-	-
-	High expressed in -rmal tissue (-t significant)	High expressed in malignant cells
High expressed in tumor tissue (-t significant)	High expressed in tumor tissue	High expressed in malignant cells
High expressed in -rmal tissue (-t significant)	-	-
High expressed in tumor tissue	-	-
High expressed in tumor tissue	-	-
High expressed in tumor tissue (-t significant)	-	-
High expressed in tumor tissue (-t significant)	-	High expressed in malignant cells
High expressed in tumor tissue	-	High expressed in malignant cells
-	-	-
High expressed in -rmal tissue (-t significant)	-	-
High expressed in tumor tissue (-t significant)	-	-
High expressed in tumor tissue	High expressed in tumor tissue	-
-	-	-
-	-	High expressed in malignant cells
-	-	High expressed in malignant cells
-	-	High expressed in malignant cells
